# Supplementary material
Source: PubMed Central journal article supplement (PMC7166796)
Supplement: JBI-47-275-s001.pdf [file JBI-47-275-s001.pdf]

## APPENDIX 1

### Functional traits explain amphibian distribution in the Brazilian Atlantic Forest

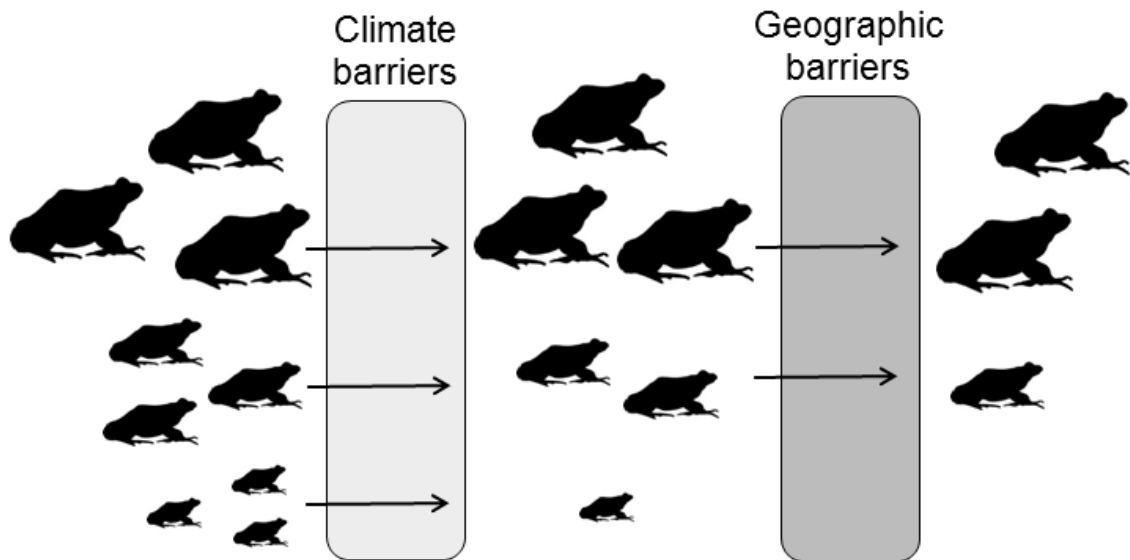

**FIGURE 1.1** Hypothetical diagrams showing that amphibians with large to medium body sizes and typical of open areas are better adapted to climate and geographical barriers, suggesting greater dispersal abilities

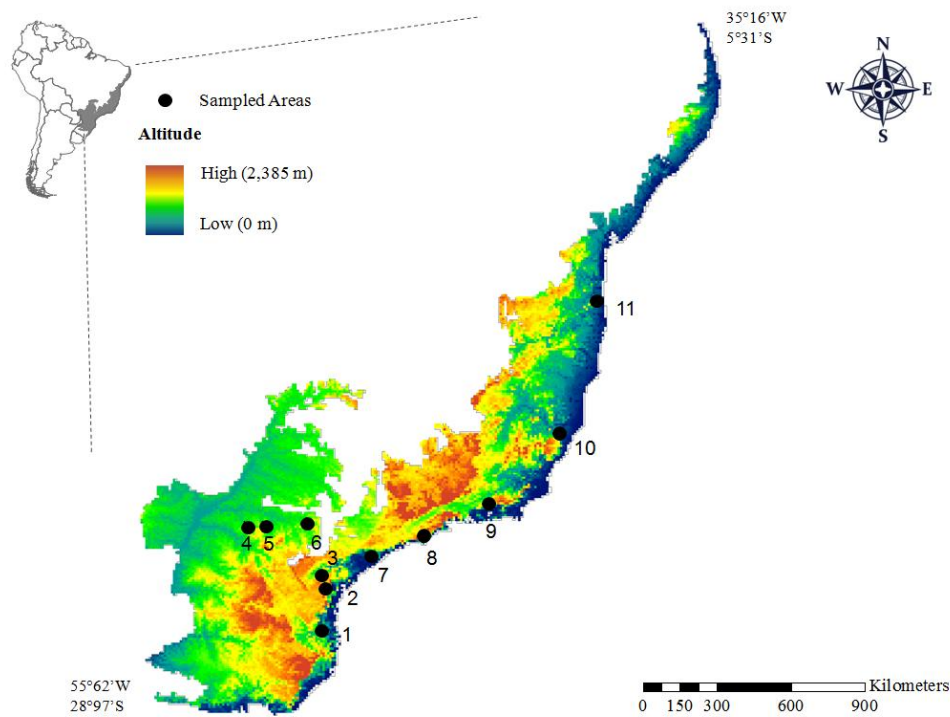

**FIGURE 1.2** Location of Brazilian Atlantic Forest hotspot (in gray) in South America.

Black dots indicate sampled areas: 1. Parque Ecológico Spitzkopf, SC; 2. Parque Estadual Pico do Marumbi, PR; 3. Parque estadual de Campinhos, PR; 4. Parque municipal das Perobas, PR; 5. Parque Estadual Mata dos Godoy, PR; 6. Refugio municipal da vida Silvestre, Horto Florestal de Jacarezinho, PR; 7. Estação Ecológica de Juréia-Itatins, SP; 8. Parque Estadual da Serra do Mar Núcleo Caraguatatuba, SP; 9. Parque Nacional da Serra dos Órgãos, RJ; 10. Reserva Biológica Augusto Ruschi, ES; 11. Reserva Biológica de Una, BA.

**TABLE 1.1** List of species studied in alphabetical order with their respective distribution area (range = grid of 10 x 10 km) and functional traits.

| Species                          | Range | Activity          | Body size (cm) | Toxicity  | Habit      | Habitat                 | Reproductive mode | References                                                           |
|----------------------------------|-------|-------------------|----------------|-----------|------------|-------------------------|-------------------|----------------------------------------------------------------------|
| <i>Adelophryne glandulata</i>    | 3     | Nocturnal         | 1,2            | Non-toxic | Cryptic    | Forested areas          | Direct            | Lourenço-de-Moraes et al., 2014; present study                       |
| <i>Adelophryne meridionalis</i>  | 2     | Nocturnal         | 1,1            | Non-toxic | Cryptic    | Forested areas          | Direct            | Santana et al., 2012; present study                                  |
| <i>Adelophryne mucronata</i>     | 38    | Nocturnal         | 1,4            | Non-toxic | Cryptic    | Forested areas          | Direct            | Lourenço-de-Moraes et al., 2012a; Haddad et al., 2013; present study |
| <i>Adelophryne pachydactyla</i>  | 301   | Nocturnal         | 1,4            | Non-toxic | Cryptic    | Forested areas          | Direct            | Lourenço-de-Moraes et al., 2012; Haddad et al., 2013; present study  |
| <i>Adenomera ajurauna</i>        | 27    | Nocturnal         | 1,9            | Non-toxic | Cryptic    | Forested areas          | Indirect          | Haddad et al., 2013                                                  |
| <i>Adenomera araucaria</i>       | 66    | Nocturnal         | 1,9            | Non-toxic | Cryptic    | Forested areas          | Indirect          | Haddad et al., 2013                                                  |
| <i>Adenomera bokermanni</i>      | 2624  | Nocturnal         | 2,4            | Non-toxic | Cryptic    | Forested areas          | Indirect          | Haddad et al., 2013                                                  |
| <i>Adenomera engelsi</i>         | 45    | Diurnal/nocturnal | 2,2            | Non-toxic | Cryptic    | Forested areas          | Indirect          | Haddad et al., 2013; present study                                   |
| <i>Adenomera marmorata</i>       | 2378  | Diurnal/nocturnal | 2,1            | Non-toxic | Cryptic    | Open and Forested areas | Indirect          | Haddad et al., 2013; present study                                   |
| <i>Adenomera nana</i>            | 224   | Nocturnal         | 1,8            | Non-toxic | Cryptic    | Forested areas          | Indirect          | Haddad et al., 2013                                                  |
| <i>Adenomera thomei</i>          | 299   | Nocturnal         | 2,4            | Non-toxic | Cryptic    | Forested areas          | Indirect          | Haddad et al., 2013; present study                                   |
| <i>Allobates alagoanus</i>       | 6     | Diurnal           | 1,5            | Non-toxic | Rheophilic | Forested areas          | Indirect          | Haddad et al., 2013                                                  |
| <i>Allobates capixaba</i>        | 578   | Diurnal           | 1,6            | Non-toxic | Rheophilic | Open and Forested areas | Indirect          | Haddad et al., 2013; present study                                   |
| <i>Allobates olfersioides</i>    | 2322  | Diurnal           | 1,6            | Non-toxic | Rheophilic | Open and Forested areas | Indirect          | Haddad et al., 2013; Lourenço-de-Moraes et al., 2013; present study  |
| <i>Aparasphenodon arapapa</i>    | 842   | Nocturnal         | 4,5            | Non-toxic | Arboreal   | Forested areas          | Indirect          | Haddad et al., 2013; Lourenço-de-Moraes et al., 2013; present study  |
| <i>Aparasphenodon bokermanni</i> | 2     | Nocturnal         | 4,6            | Non-toxic | Arboreal   | Forested areas          | Indirect          | Haddad et al., 2013                                                  |
| <i>Aparasphenodon</i>            | 2532  | Nocturnal         | 8              | Non-toxic | Arboreal   | Forested areas          | Indirect          | Haddad et al., 2013; present study                                   |

---

|                                   |      |           |     |                          |          |                         |          |                                              |  |
|-----------------------------------|------|-----------|-----|--------------------------|----------|-------------------------|----------|----------------------------------------------|--|
| <i>brunoi</i>                     |      |           |     |                          |          |                         |          |                                              |  |
| <i>Aplastodiscus albofrenatus</i> | 435  | Nocturnal | 3,9 | Unpalatable or bad odour | Arboreal | Forested areas          | Indirect | Haddad et al., 2013; present study           |  |
| <i>Aplastodiscus albosignatus</i> | 1077 | Nocturnal | 4,3 | Unpalatable or bad odour | Arboreal | Forested areas          | Indirect | Haddad et al., 2013; present study           |  |
| <i>Aplastodiscus arildae</i>      | 1903 | Nocturnal | 3,7 | Unpalatable or bad odour | Arboreal | Forested areas          | Indirect | Haddad et al., 2013; present study           |  |
| <i>Aplastodiscus callipygius</i>  | 404  | Nocturnal | 4,6 | Unpalatable or bad odour | Arboreal | Forested areas          | Indirect | Haddad et al., 2013                          |  |
| <i>Aplastodiscus cavicola</i>     | 587  | Nocturnal | 3,7 | Unpalatable or bad odour | Arboreal | Forested areas          | Indirect | Haddad et al., 2013                          |  |
| <i>Aplastodiscus cochranæ</i>     | 173  | Nocturnal | 4,5 | Unpalatable or bad odour | Arboreal | Open and Forested areas | Indirect | Haddad et al., 2013                          |  |
| <i>Aplastodiscus ehrhardti</i>    | 395  | Nocturnal | 3,1 | Unpalatable or bad odour | Arboreal | Forested areas          | Indirect | Haddad et al., 2013; present study           |  |
| <i>Aplastodiscus eugenioi</i>     | 269  | Nocturnal | 3,5 | Unpalatable or bad odour | Arboreal | Forested areas          | Indirect | Haddad et al., 2013                          |  |
| <i>Aplastodiscus flumineus</i>    | 9    | Nocturnal | 4,5 | Unpalatable or bad odour | Arboreal | Forested areas          | Indirect | Haddad et al., 2013                          |  |
| <i>Aplastodiscus ibirabitanga</i> | 519  | Nocturnal | 4,1 | Unpalatable or bad odour | Arboreal | Forested areas          | Indirect | Haddad et al., 2013; present study           |  |
| <i>Aplastodiscus leucoeygius</i>  | 1588 | Nocturnal | 4,5 | Unpalatable or bad odour | Arboreal | Forested areas          | Indirect | Haddad et al., 2013                          |  |
| <i>Aplastodiscus musicus</i>      | 13   | Nocturnal | 5   | Unpalatable or bad odour | Arboreal | Forested areas          | Indirect | Lutz 1949; Cruz et al., .2004; present study |  |
| <i>Aplastodiscus perviridis</i>   | 5781 | Nocturnal | 4,5 | Unpalatable or bad odour | Arboreal | Forested areas          | Indirect | Haddad et al., 2013; present study           |  |
| <i>Aplastodiscus sibilatus</i>    | 271  | Nocturnal | 3,2 | Unpalatable or bad odour | Arboreal | Forested areas          | Indirect | Haddad et al., 2013                          |  |
| <i>Aplastodiscus weygoldti</i>    | 34   | Nocturnal | 3,8 | Unpalatable or bad odour | Arboreal | Forested areas          | Indirect | Haddad et al., 2013; present study           |  |
| <i>Arcovomer passarellii</i>      | 779  | Nocturnal | 2,4 | Non-toxic                | Cryptic  | Forested areas          | Indirect | Haddad et al., 2013                          |  |
| <i>Boana albomarginata</i>        | 4594 | Nocturnal | 5,8 | Non-toxic                | Arboreal | Open areas              | Indirect | Haddad et al., 2013; present study           |  |
| <i>Boana</i>                      | 7663 | Nocturnal | 6,5 | Non-toxic                | Arboreal | Open areas              | Indirect | Haddad et al., 2013; present study           |  |

---

---

|                               |      |           |     |           |          |                            |          |                                         |  |
|-------------------------------|------|-----------|-----|-----------|----------|----------------------------|----------|-----------------------------------------|--|
| <i>albopunctata</i>           |      |           |     |           |          |                            |          |                                         |  |
| <i>Boana atlantica</i>        | 1007 | Nocturnal | 4   | Non-toxic | Arboreal | Open areas                 | Indirect | Haddad et al., 2013; present study      |  |
| <i>Boana bischoffi</i>        | 2422 | Nocturnal | 5,9 | Non-toxic | Arboreal | Open areas                 | Indirect | Haddad et al., 2013; present study      |  |
| <i>Boana caingua</i>          | 1241 | Nocturnal | 3,9 | Non-toxic | Arboreal | Open areas                 | Indirect | Haddad et al., 2013; present study      |  |
| <i>Boana caipora</i>          | 14   | Nocturnal | 4   | Non-toxic | Arboreal | Forested areas             | Indirect | Haddad et al., 2013                     |  |
| <i>Boana crepitans</i>        | 7978 | Nocturnal | 6,2 | Non-toxic | Arboreal | Open areas                 | Indirect | Haddad et al., 2013; present study      |  |
| <i>Boana curupi</i>           | 121  | Nocturnal | 4,5 | Non-toxic | Arboreal | Forested areas             | Indirect | Haddad et al., 2013                     |  |
| <i>Boana cymbalum</i>         | 8    | Nocturnal | 4,9 | Non-toxic | Arboreal | Open areas                 | Indirect | Bokermann 1963; Garcia & Rodrigues 2004 |  |
| <i>Boana exastis</i>          | 47   | Nocturnal | 9,2 | Non-toxic | Arboreal | Forested areas             | Indirect | Haddad et al., 2013; present study      |  |
| <i>Boana faber</i>            | 9183 | Nocturnal | 8,9 | Non-toxic | Arboreal | Open and<br>Forested areas | Indirect | Haddad et al., 2013; present study      |  |
| <i>Boana freicanecae</i>      | 1    | Nocturnal | 4   | Non-toxic | Arboreal | Forested areas             | Indirect | Haddad et al., 2013                     |  |
| <i>Boana guentheri</i>        | 373  | Nocturnal | 4,6 | Non-toxic | Arboreal | Open and<br>Forested areas | Indirect | Haddad et al., 2013                     |  |
| <i>Boana joaquina</i>         | 158  | Nocturnal | 5,4 | Non-toxic | Arboreal | Open and<br>Forested areas | Indirect | Haddad et al., 2013                     |  |
| <i>Boana latistriata</i>      | 24   | Nocturnal | 4,7 | Non-toxic | Arboreal | Forested areas             | Indirect | Haddad et al., 2013                     |  |
| <i>Boana<br/>leptolineata</i> | 1499 | Nocturnal | 3,3 | Non-toxic | Arboreal | Open areas                 | Indirect | Haddad et al., 2013                     |  |
| <i>Boana lundii</i>           | 3083 | Nocturnal | 6,9 | Non-toxic | Arboreal | Open and<br>Forested areas | Indirect | Haddad et al., 2013                     |  |
| <i>Boana marginata</i>        | 205  | Nocturnal | 5,3 | Non-toxic | Arboreal | Forested areas             | Indirect | Haddad et al., 2013                     |  |
| <i>Boana pardalis</i>         | 2279 | Nocturnal | 6,8 | Non-toxic | Arboreal | Open and<br>Forested areas | Indirect | Haddad et al., 2013                     |  |
| <i>Boana poaju</i>            | 7    | Nocturnal | 3,9 | Non-toxic | Arboreal | Forested areas             | Indirect | Haddad et al., 2013                     |  |
| <i>Boana polytaenia</i>       | 1685 | Nocturnal | 3,6 | Non-toxic | Arboreal | Open areas                 | Indirect | Haddad et al., 2013                     |  |
| <i>Boana pombali</i>          | 1055 | Nocturnal | 5,7 | Non-toxic | Arboreal | Forested areas             | Indirect | Haddad et al., 2013; present study      |  |
| <i>Boana prasina</i>          | 2974 | Nocturnal | 4,8 | Non-toxic | Arboreal | Open and<br>Forested areas | Indirect | Haddad et al., 2013; present study      |  |
| <i>Boana pulchella</i>        | 2241 | Nocturnal | 4,5 | Non-toxic | Arboreal | Open and<br>Forested areas | Indirect | Haddad et al., 2013                     |  |

---

|                                    |      |           |     |                          |             |                         |          |                                                                     |
|------------------------------------|------|-----------|-----|--------------------------|-------------|-------------------------|----------|---------------------------------------------------------------------|
| <i>Boana punctata</i>              | 6355 | Nocturnal | 3,9 | Non-toxic                | Arboreal    | Open areas              | Indirect | Haddad et al., 2013                                                 |
| <i>Boana raniceps</i>              | 3978 | Nocturnal | 7,1 | Non-toxic                | Arboreal    | Open areas              | Indirect | Haddad et al., 2013; present study                                  |
| <i>Boana secedens</i>              | 129  | Nocturnal | 4,9 | Non-toxic                | Arboreal    | Forested areas          | Indirect | Haddad et al., 2013                                                 |
| <i>Boana semiguttata</i>           | 222  | Nocturnal | 4,1 | Non-toxic                | Arboreal    | Forested areas          | Indirect | Haddad et al., 2013                                                 |
| <i>Boana semilineata</i>           | 5012 | Nocturnal | 5,6 | Non-toxic                | Arboreal    | Forested areas          | Indirect | Haddad et al., 2013; present study                                  |
| <i>Boana stellae</i>               | 164  | Nocturnal | 4,6 | Non-toxic                | Arboreal    | Forested areas          | Indirect | Haddad et al., 2013                                                 |
| <i>Boana stenocephala</i>          | 7    | Nocturnal | 2,7 | Non-toxic                | Arboreal    | Open areas              | Indirect | Haddad et al., 2013                                                 |
| <i>Bokermannohyla ahenea</i>       | 2    | Nocturnal | 5,2 | Unpalatable or bad odour | Arboreal    | Forested areas          | Indirect | Haddad et al., 2013                                                 |
| <i>Bokermannohyla astartea</i>     | 1101 | Nocturnal | 4,4 | Unpalatable or bad odour | Arboreal    | Forested areas          | Indirect | Haddad et al., 2013; present study                                  |
| <i>Bokermannohyla capra</i>        | 32   | Nocturnal | 6,1 | Unpalatable or bad odour | Arboreal    | Forested areas          | Indirect | Haddad et al., 2013                                                 |
| <i>Bokermannohyla caramaschii</i>  | 358  | Nocturnal | 6,2 | Unpalatable or bad odour | Arboreal    | Forested areas          | Indirect | Haddad et al., 2013; present study                                  |
| <i>Bokermannohyla carvalhoi</i>    | 168  | Nocturnal | 6,4 | Unpalatable or bad odour | Terrestrial | Forested areas          | Indirect | Haddad et al., 2013                                                 |
| <i>Bokermannohyla circumdata</i>   | 1109 | Nocturnal | 5,4 | Unpalatable or bad odour | Arboreal    | Forested areas          | Indirect | Haddad et al., 2013; present study                                  |
| <i>Bokermannohyla claresignata</i> | 101  | Nocturnal | 6,1 | Unpalatable or bad odour | Arboreal    | Forested areas          | Indirect | Lutz & Lutz 1939; Carvalho-e-Silva & Caramaschi 2004; present study |
| <i>Bokermannohyla clepsydra</i>    | 67   | Nocturnal | 4   | Unpalatable or bad odour | Arboreal    | Forested areas          | Indirect | Lutz 1925; Carvalho-e-Silva & Telles 2004a; present study           |
| <i>Bokermannohyla diamantina</i>   | 6    | Nocturnal | 4,9 | Unpalatable or bad odour | Arboreal    | Forested areas          | Indirect | Haddad et al., 2013                                                 |
| <i>Bokermannohyla gouveai</i>      | 41   | Nocturnal | 6,9 | Unpalatable or bad odour | Arboreal    | Open and Forested areas | Indirect | Haddad et al., 2013                                                 |
| <i>Bokermannohyla hylax</i>        | 979  | Nocturnal | 6,6 | Unpalatable or bad odour | Arboreal    | Forested areas          | Indirect | Haddad et al., 2013; present study                                  |
| <i>Bokermannohyla ibitipoca</i>    | 2    | Nocturnal | 3,9 | Unpalatable or bad odour | Terrestrial | Forested areas          | Indirect | Haddad et al., 2013                                                 |
| <i>Bokermannohyla itapoty</i>      | 25   | Nocturnal | 4,1 | Unpalatable or bad odour | Arboreal    | Open areas              | Indirect | Haddad et al., 2013                                                 |

|                                     |      |           |     |                          |             |                |          |                                                       |
|-------------------------------------|------|-----------|-----|--------------------------|-------------|----------------|----------|-------------------------------------------------------|
| <i>Bokermannohyla izecksohni</i>    | 2    | Nocturnal | 3,1 | Unpalatable or bad odour | Arboreal    | Forested areas | Indirect | Haddad et al., 2013                                   |
| <i>Bokermannohyla langei</i>        | 4    | Nocturnal | 6,6 | Unpalatable or bad odour | Arboreal    | Forested areas | Indirect | Bokermann 1965; Segalla & Silvano 2004; present study |
| <i>Bokermannohyla lucianae</i>      | 1    | Nocturnal | 4,7 | Unpalatable or bad odour | Arboreal    | Forested areas | Indirect | Haddad et al., 2013; present study                    |
| <i>Bokermannohyla luctuosa</i>      | 450  | Nocturnal | 6,7 | Unpalatable or bad odour | Arboreal    | Forested areas | Indirect | Haddad et al., 2013                                   |
| <i>Bokermannohyla martinsi</i>      | 224  | Nocturnal | 7,3 | Unpalatable or bad odour | Terrestrial | Forested areas | Indirect | Haddad et al., 2013                                   |
| <i>Bokermannohyla nanuzae</i>       | 121  | Nocturnal | 4,4 | Unpalatable or bad odour | Arboreal    | Forested areas | Indirect | Haddad et al., 2013                                   |
| <i>Bokermannohyla oxente</i>        | 1    | Nocturnal | 4,9 | Unpalatable or bad odour | Arboreal    | Open areas     | Indirect | Haddad et al., 2013                                   |
| <i>Brachycephalus alipioi</i>       | 9    | Diurnal   | 1,4 | Toxic                    | Cryptic     | Forested areas | Direct   | Haddad et al., 2013                                   |
| <i>Brachycephalus auroguttatus</i>  | 4    | Diurnal   | 1,3 | Toxic                    | Cryptic     | Forested areas | Direct   | Ribeiro et al., 2015                                  |
| <i>Brachycephalus boticario</i>     | 2    | Diurnal   | 1,2 | Toxic                    | Cryptic     | Forested areas | Direct   | Ribeiro et al., 2015                                  |
| <i>Brachycephalus brunneus</i>      | 1    | Diurnal   | 1,2 | Non-toxic                | Cryptic     | Forested areas | Direct   | Haddad et al., 2013                                   |
| <i>Brachycephalus didactylus</i>    | 474  | Diurnal   | 0,8 | Non-toxic                | Cryptic     | Forested areas | Direct   | Haddad et al., 2013                                   |
| <i>Brachycephalus ephippium</i>     | 1863 | Diurnal   | 1,9 | Toxic                    | Cryptic     | Forested areas | Direct   | Haddad et al., 2013; present study                    |
| <i>Brachycephalus ferruginus</i>    | 16   | Diurnal   | 1,4 | Toxic                    | Cryptic     | Forested areas | Direct   | Haddad et al., 2013                                   |
| <i>Brachycephalus fuscolineatus</i> | 2    | Diurnal   | 1,2 | Non-toxic                | Cryptic     | Forested areas | Direct   | Ribeiro et al., 2015                                  |
| <i>Brachycephalus garbeanus</i>     | 9    | Diurnal   | 1,7 | Toxic                    | Cryptic     | Forested areas | Direct   | Haddad et al., 2013                                   |
| <i>Brachycephalus guarani</i>       | 23   | Diurnal   | 1,3 | Toxic                    | Cryptic     | Forested areas | Direct   | Haddad et al., 2013                                   |
| <i>Brachycephalus hermogenesi</i>   | 653  | Diurnal   | 1,1 | Non-toxic                | Cryptic     | Forested areas | Direct   | Haddad et al., 2013                                   |

|                                     |      |           |      |           |         |                |          |                      |
|-------------------------------------|------|-----------|------|-----------|---------|----------------|----------|----------------------|
| <i>Brachycephalus izecksohni</i>    | 4    | Diurnal   | 1,3  | Non-toxic | Cryptic | Forested areas | Direct   | Haddad et al., 2013  |
| <i>Brachycephalus leopardus</i>     | 2    | Diurnal   | 1,2  | Toxic     | Cryptic | Forested areas | Direct   | Ribeiro et al., 2015 |
| <i>Brachycephalus margaritatus</i>  | 10   | Diurnal   | 1,7  | Toxic     | Cryptic | Forested areas | Direct   | Haddad et al., 2013  |
| <i>Brachycephalus mariaterrezae</i> | 2    | Diurnal   | 1,3  | Toxic     | Cryptic | Forested areas | Direct   | Ribeiro et al., 2015 |
| <i>Brachycephalus nodoterga</i>     | 6    | Diurnal   | 1,3  | Toxic     | Cryptic | Forested areas | Direct   | Haddad et al., 2013  |
| <i>Brachycephalus olivaceus</i>     | 2    | Diurnal   | 1,3  | Toxic     | Cryptic | Forested areas | Direct   | Ribeiro et al., 2015 |
| <i>Brachycephalus pernix</i>        | 2    | Diurnal   | 1,5  | Toxic     | Cryptic | Forested areas | Direct   | Haddad et al., 2013  |
| <i>Brachycephalus pitanga</i>       | 8    | Diurnal   | 1,3  | Toxic     | Cryptic | Forested areas | Direct   | Haddad et al., 2013  |
| <i>Brachycephalus pombali</i>       | 10   | Diurnal   | 1,5  | Toxic     | Cryptic | Forested areas | Direct   | Haddad et al., 2013  |
| <i>Brachycephalus pulex</i>         | 10   | —         | 0,8  | Non-toxic | Cryptic | Forested areas | Direct   | Haddad et al., 2013  |
| <i>Brachycephalus toby</i>          | 7    | Diurnal   | 1,4  | Toxic     | Cryptic | Forested areas | Direct   | Haddad et al., 2013  |
| <i>Brachycephalus tridactylus</i>   | 14   | Diurnal   | 1,4  | Toxic     | Cryptic | Forested areas | Direct   | Haddad et al., 2013  |
| <i>Brachycephalus verrucosus</i>    | 2    | Diurnal   | 1,3  | Toxic     | Cryptic | Forested areas | Direct   | Ribeiro et al., 2015 |
| <i>Brachycephalus vertebralis</i>   | 66   | Diurnal   | 1,4  | Toxic     | Cryptic | Forested areas | Direct   | Haddad et al., 2013  |
| <i>Ceratophrys aurita</i>           | 5003 | Nocturnal | 14,9 | Non-toxic | Cryptic | Forested areas | Indirect | Haddad et al., 2013  |
| <i>Chiasmocleis alagoana</i>        | 5    | Nocturnal | 2,7  | Non-toxic | Cryptic | Forested areas | Indirect | Haddad et al., 2013  |
| <i>Chiasmocleis atlantica</i>       | 562  | Nocturnal | 3,2  | Non-toxic | Cryptic | Forested areas | Indirect | Haddad et al., 2013  |
| <i>Chiasmocleis capixaba</i>        | 495  | Nocturnal | 1,5  | Non-toxic | Cryptic | Forested areas | Indirect | Haddad et al., 2013  |



|                                    |      |                   |      |           |            |                         |          |                                     |
|------------------------------------|------|-------------------|------|-----------|------------|-------------------------|----------|-------------------------------------|
| <i>Chiasmocleis carvalhoi</i>      | 741  | Nocturnal         | 2,3  | Non-toxic | Cryptic    | Forested areas          | Indirect | Haddad et al., 2013                 |
| <i>Chiasmocleis cordeiroi</i>      | 1    | Nocturnal         | 2,2  | Non-toxic | Cryptic    | Forested areas          | Indirect | Caramaschi & Pimenta 2003, 2004     |
| <i>Chiasmocleis crucis</i>         | 1    | Nocturnal         | 2    | Non-toxic | Cryptic    | Forested areas          | Indirect | Haddad et al., 2013                 |
| <i>Chiasmocleis gnoma</i>          | 1    | Nocturnal         | 1,6  | Non-toxic | Cryptic    | Forested areas          | Indirect | Haddad et al., 2013                 |
| <i>Chiasmocleis leucosticta</i>    | 1533 | Diurnal/nocturnal | 2,5  | Non-toxic | Cryptic    | Forested areas          | Indirect | Haddad et al., 2013                 |
| <i>Chiasmocleis mantiqueira</i>    | 2    | Nocturnal         | 2,2  | Non-toxic | Cryptic    | Forested areas          | Indirect | Haddad et al., 2013                 |
| <i>Chiasmocleis sapiranga</i>      | 3    | Nocturnal         | 2,5  | Non-toxic | Cryptic    | Forested areas          | Indirect | Cruz et al., 2007; Ângulo 2008      |
| <i>Chiasmocleis schubarti</i>      | 1398 | Nocturnal         | 3,3  | Non-toxic | Cryptic    | Forested areas          | Indirect | Haddad et al., 2013                 |
| <i>Chthonerpeton indistinctum</i>  | 528  | —                 | 43,5 | —         | Aquatic    | Open and Forested areas | Direct   | Haddad et al., 2013                 |
| <i>Chthonerpeton noctinectes</i>   | 3    | —                 | 34,5 | —         | Aquatic    | Open and Forested areas | Direct   | Silva et al., 2003; Wilkinson 2004  |
| <i>Chthonerpeton viviparum</i>     | 12   | —                 | 55,8 | —         | Aquatic    | Open and Forested areas | Direct   | Taylor 1968; Measey et al., 2004    |
| <i>Crossodactylodes bokermanni</i> | 36   | Nocturnal         | 1,4  | Non-toxic | Arboreal   | Forested areas          | Indirect | Haddad et al., 2013                 |
| <i>Crossodactylodes izecksohni</i> | 4    | Nocturnal         | 1,5  | Non-toxic | Arboreal   | Forested areas          | Indirect | Haddad et al., 2013                 |
| <i>Crossodactylodes pintoï</i>     | 4    | Nocturnal         | 1,7  | Non-toxic | Arboreal   | Forested areas          | Indirect | Cochran 1938; Peixoto et al., 2004  |
| <i>Crossodactylus aeneus</i>       | 1212 | —                 | 2,3  | Non-toxic | Rheophilic | Forested areas          | Indirect | Haddad et al., 2013                 |
| <i>Crossodactylus bokermanni</i>   | 2    | —                 | 2,7  | Non-toxic | Rheophilic | Forested areas          | Indirect | Haddad et al., 2013                 |
| <i>Crossodactylus caramaschii</i>  | 672  | Diurnal/nocturnal | 2,3  | Non-toxic | Rheophilic | Forested areas          | Indirect | Haddad et al., 2013; present study  |
| <i>Crossodactylus cyclospinus</i>  | 8    | —                 | 2,9  | Non-toxic | Rheophilic | Forested areas          | Indirect | Nascimento & Cruz 2005; Ângulo 2008 |

|                                    |      |                   |     |           |            |                |          |                                                                     |
|------------------------------------|------|-------------------|-----|-----------|------------|----------------|----------|---------------------------------------------------------------------|
| <i>Crossodactylus dantei</i>       | 2    | —                 | 2,2 | Non-toxic | Rheophilic | Forested areas | Indirect | Haddad et al., 2013                                                 |
| <i>Crossodactylus dispar</i>       | 1187 | Diurnal           | 3,1 | Non-toxic | Rheophilic | Forested areas | Indirect | Haddad et al., 2013                                                 |
| <i>Crossodactylus gaudichaudii</i> | 783  | Diurnal/nocturnal | 3,1 | Non-toxic | Rheophilic | Forested areas | Indirect | Haddad et al., 2013                                                 |
| <i>Crossodactylus grandis</i>      | 133  | Diurnal           | 4,2 | Non-toxic | Rheophilic | Forested areas | Indirect | Haddad et al., 2013                                                 |
| <i>Crossodactylus lutzorum</i>     | 4    | —                 | 2,6 | Non-toxic | Rheophilic | Forested areas | Indirect | Carcereli & Caramaschii 1993; Silvano & 2004b; Pimenta et al., 2014 |
| <i>Crossodactylus schmidti</i>     | 255  | Nocturnal         | 2,8 | Non-toxic | Rheophilic | Forested areas | Indirect | Haddad et al., 2013                                                 |
| <i>Crossodactylus trachystomus</i> | 25   | —                 | 2,5 | Non-toxic | Rheophilic | Forested areas | Indirect | Cochran 1955; Pimenta & Nascimento 2010                             |
| <i>Cycloramphus acangatan</i>      | 125  | Nocturnal         | 4,3 | —         | Cryptic    | Forested areas | Indirect | Haddad et al., 2013; present study                                  |
| <i>Cycloramphus asper</i>          | 188  | Nocturnal         | 3,5 | —         | Rheophilic | Forested areas | Indirect | Cochran 1955; Heyer et al., 2004                                    |
| <i>Cycloramphus bandeirensis</i>   | 5    | —                 | 4,5 | —         | Rheophilic | Open areas     | Indirect | Haddad et al., 2013                                                 |
| <i>Cycloramphus bolitoglossus</i>  | 306  | Nocturnal         | 3,8 | —         | Cryptic    | Forested areas | Indirect | Haddad et al., 2013                                                 |
| <i>Cycloramphus boraceiensis</i>   | 571  | Nocturnal         | 4,7 | —         | Rheophilic | Forested areas | Indirect | Haddad et al., 2013; present study                                  |
| <i>Cycloramphus brasiliensis</i>   | 340  | Nocturnal         | 6,2 | —         | Rheophilic | Forested areas | Indirect | Haddad et al., 2013; present study                                  |
| <i>Cycloramphus carvalhoi</i>      | 5    | —                 | 5,6 | —         | Cryptic    | Forested areas | Indirect | Haddad et al., 2013                                                 |
| <i>Cycloramphus catarinensis</i>   | 2    | Nocturnal         | 3,5 | —         | Rheophilic | Forested areas | Indirect | Haddad et al., 2013                                                 |
| <i>Cycloramphus cedrensis</i>      | 9    | —                 | 4,9 | —         | Rheophilic | Forested areas | Indirect | Heyer 1983; Heyer & Silvano 2004a                                   |
| <i>Cycloramphus diringshofeni</i>  | 53   | —                 | 3,1 | —         | Rheophilic | Forested areas | Indirect | Bokermann 1965; Heyer et al., 2004                                  |
| <i>Cycloramphus dubius</i>         | 32   | Nocturnal         | 4,9 | —         | Rheophilic | Forested areas | Indirect | Haddad et al., 2013                                                 |

|                                       |      |           |     |           |            |                |          |                                                  |
|---------------------------------------|------|-----------|-----|-----------|------------|----------------|----------|--------------------------------------------------|
| <i>Cycloramphus duseni</i>            | 9    | —         | 3,7 | —         | Rheophilic | Forested areas | Indirect | Heyer 1983; Verdade & Segalla 2004               |
| <i>Cycloramphus eleutherodactylus</i> | 1891 | Nocturnal | 4,8 | —         | Cryptic    | Forested areas | Indirect | Haddad et al., 2013; present study               |
| <i>Cycloramphus fuliginosus</i>       | 1052 | Nocturnal | 3,3 | —         | Rheophilic | Forested areas | Indirect | Cochran 1955; Verdade & Carvalho-e-Silva 2004    |
| <i>Cycloramphus granulosis</i>        | 104  | —         | 4,2 | —         | Rheophilic | Forested areas | Indirect | Bokermann 1951; Heyer & Verdade 2004             |
| <i>Cycloramphus izecksohni</i>        | 226  | Nocturnal | 4   | —         | Rheophilic | Forested areas | Indirect | Haddad et al., 2013                              |
| <i>Cycloramphus juimirim</i>          | 5    | Nocturnal | 3   | —         | Rheophilic | Forested areas | Indirect | Haddad et al., 2013                              |
| <i>Cycloramphus lithomimeticus</i>    | 62   | Nocturnal | 3,1 | —         | Rheophilic | Forested areas | Indirect | Haddad et al., 2013                              |
| <i>Cycloramphus lutzorum</i>          | 634  | Nocturnal | 4,1 | —         | Rheophilic | Forested areas | Indirect | Haddad et al., 2013                              |
| <i>Cycloramphus migueli</i>           | 24   | —         | 4,2 | —         | Cryptic    | Forested areas | Indirect | Haddad et al., 2013                              |
| <i>Cycloramphus mirandaribeiroi</i>   | 4    | —         | 6,9 | —         | Rheophilic | Forested areas | Indirect | Heyer 1983; Heyer & Silvano 2004b                |
| <i>Cycloramphus ohausi</i>            | 17   | —         | 3,8 | —         | Rheophilic | Forested areas | Indirect | Cochran 1955; Rodrigues & Carvalho-e-Silva 2004b |
| <i>Cycloramphus organensis</i>        | 31   | Nocturnal | 3,2 | —         | Rheophilic | Open areas     | Indirect | Haddad et al., 2013                              |
| <i>Cycloramphus rhyakonastes</i>      | 17   | Nocturnal | 4,2 | —         | Rheophilic | Forested areas | Indirect | Haddad et al., 2013                              |
| <i>Cycloramphus semipalmatus</i>      | 108  | —         | 5   | —         | Rheophilic | Forested areas | Indirect | Heyer 1983; Verdade & Heyer 2004a                |
| <i>Cycloramphus stejneri</i>          | 17   | —         | 5,6 | —         | Cryptic    | Forested areas | Indirect | Heyer 1983; Verdade & Heyer 2004b                |
| <i>Cycloramphus valae</i>             | 96   | —         | 3,6 | —         | Rheophilic | Forested areas | Indirect | Haddad et al., 2013                              |
| <i>Dasypops schirchi</i>              | 186  | Nocturnal | 5,2 | Non-toxic | Cryptic    | Forested areas | Direct   | Haddad et al., 2013                              |
| <i>Dendrophryniscus berthallutzae</i> | 374  | Nocturnal | 2,4 | Non-toxic | Cryptic    | Forested areas | Indirect | Haddad et al., 2013                              |
| <i>Dendrophryniscus</i>               | 758  | Nocturnal | 2   | Non-toxic | Arboreal   | Forested areas | Indirect | Haddad et al., 2013; present study               |

---

|                                      |      |           |     |                          |           |                         |          |                                                                      |
|--------------------------------------|------|-----------|-----|--------------------------|-----------|-------------------------|----------|----------------------------------------------------------------------|
| <i>brevipollicatus</i>               |      |           |     |                          |           |                         |          |                                                                      |
| <i>Dendrophryniscus carvalhoi</i>    | 31   | —         | 1,9 | Non-toxic                | Cryptic   | Forested areas          | Indirect | Haddad et al., 2013                                                  |
| <i>Dendrophryniscus krausae</i>      | 8    | —         | 2,3 | Non-toxic                | Fossorial | Forested areas          | Indirect | Haddad et al., 2013                                                  |
| <i>Dendrophryniscus leucomystax</i>  | 905  | Nocturnal | 2,5 | Non-toxic                | Cryptic   | Forested areas          | Indirect | Haddad et al., 2013; present study                                   |
| <i>Dendrophryniscus oreites</i>      | 29   | —         | 2,5 | Non-toxic                | Arboreal  | Forested areas          | Indirect | Haddad et al., 2013                                                  |
| <i>Dendrophryniscus proboscideus</i> | 1353 | Nocturnal | 4,1 | Toxic                    | Cryptic   | Forested areas          | Indirect | Haddad et al., 2013; present study                                   |
| <i>Dendrophryniscus stawiarskyi</i>  | 2    | —         | 2,2 | —                        | —         | Forested areas          | Indirect | Izecksohn 1994; Silvano et al., 2004                                 |
| <i>Dendropsophus anceps</i>          | 2294 | Nocturnal | 4,2 | Non-toxic                | Arboreal  | Open areas              | Indirect | Haddad et al., 2013                                                  |
| <i>Dendropsophus berthallutzae</i>   | 998  | Nocturnal | 2,4 | Non-toxic                | Arboreal  | Forested areas          | Indirect | Haddad et al., 2013                                                  |
| <i>Dendropsophus bipunctatus</i>     | 1622 | Nocturnal | 2,6 | Non-toxic                | Arboreal  | Open areas              | Indirect | Haddad et al., 2013; present study                                   |
| <i>Dendropsophus branneri</i>        | 3285 | Nocturnal | 2,3 | Unpalatable or bad odour | Arboreal  | Open areas              | Indirect | Haddad et al., 2013; present study                                   |
| <i>Dendropsophus decipiens</i>       | 4178 | Nocturnal | 1,9 | Non-toxic                | Arboreal  | Open and Forested areas | Indirect | Haddad et al., 2013; present study                                   |
| <i>Dendropsophus dutrai</i>          | 44   | Nocturnal | 3,8 | —                        | Arboreal  | Forested areas          | Indirect | Gomes & Peixoto 1996; Silvano & Peixoto 2004a                        |
| <i>Dendropsophus elegans</i>         | 5047 | Nocturnal | 3,1 | Non-toxic                | Arboreal  | Open areas              | Indirect | Haddad et al., 2013; present study                                   |
| <i>Dendropsophus giesleri</i>        | 855  | Nocturnal | 2,7 | Non-toxic                | Arboreal  | Forested areas          | Indirect | Haddad et al., 2013; present study                                   |
| <i>Dendropsophus haddadi</i>         | 1029 | Nocturnal | 2,3 | Non-toxic                | Arboreal  | Open and Forested areas | Indirect | Lourenço-de-Moraes et al., 2012b; Haddad et al., 2013; present study |
| <i>Dendropsophus limai</i>           | 4    | Nocturnal | 1,9 | —                        | Arboreal  | Forested areas          | Indirect | Bokermann 1962; Carvalho-e-Silva 2004                                |
| <i>Dendropsophus meridianus</i>      | 248  | Nocturnal | 1,8 | Non-toxic                | Arboreal  | Open and Forested areas | Indirect | Haddad et al., 2013                                                  |
| <i>Dendropsophus</i>                 | 3122 | Nocturnal | 2,9 | Non-toxic                | Arboreal  | Forested areas          | Indirect | Haddad et al., 2013; present study                                   |

---

---

|                                       |      |                   |     |                          |           |                         |          |                                    |
|---------------------------------------|------|-------------------|-----|--------------------------|-----------|-------------------------|----------|------------------------------------|
| <i>micros</i>                         |      |                   |     |                          |           |                         |          |                                    |
| <i>Dendropsophus minutus</i>          | 9676 | Nocturnal         | 2,5 | Unpalatable or bad odour | Arboreal  | Open areas              | Indirect | Haddad et al., 2013; present study |
| <i>Dendropsophus nahderere</i>        | 288  | Nocturnal         | 4,6 | Non-toxic                | Arboreal  | Open and Forested areas | Indirect | Haddad et al., 2013                |
| <i>Dendropsophus nanus</i>            | 7282 | Nocturnal         | 2,3 | Unpalatable or bad odour | Arboreal  | Open areas              | Indirect | Haddad et al., 2013; present study |
| <i>Dendropsophus novaisi</i>          | 40   | Nocturnal         | 3,4 | Non-toxic                | Arboreal  | Open areas              | Indirect | Haddad et al., 2013                |
| <i>Dendropsophus oliveirai</i>        | 811  | Nocturnal         | 1,9 | Non-toxic                | Arboreal  | Open areas              | Indirect | Haddad et al., 2013                |
| <i>Dendropsophus pseudomeridianus</i> | 200  | Nocturnal         | 1,7 | Non-toxic                | Arboreal  | Open areas              | Indirect | Haddad et al., 2013                |
| <i>Dendropsophus ruschii</i>          | 26   | Nocturnal         | 2,8 | Non-toxic                | Arboreal  | Forested areas          | Indirect | Haddad et al., 2013                |
| <i>Dendropsophus sanorni</i>          | 3410 | Nocturnal         | 2   | Unpalatable or bad odour | Arboreal  | Open areas              | Indirect | Haddad et al., 2013; present study |
| <i>Dendropsophus seniculus</i>        | 2681 | Nocturnal         | 3,8 | Non-toxic                | Arboreal  | Open and Forested areas | Indirect | Haddad et al., 2013                |
| <i>Dendropsophus soaresi</i>          | 315  | Nocturnal         | 3,5 | Non-toxic                | Arboreal  | Open areas              | Indirect | Haddad et al., 2013                |
| <i>Dendropsophus studerae</i>         | 2    | Nocturnal         | 2,8 | Non-toxic                | Arboreal  | Forested areas          | Indirect | Haddad et al., 2013                |
| <i>Dendropsophus weneri</i>           | 923  | Nocturnal         | 1,9 | Non-toxic                | Arboreal  | Open areas              | Indirect | Haddad et al., 2013                |
| <i>Elaschitocleis bicolor</i>         | 3457 | Nocturnal         | 3,8 | Non-toxic                | Fossorial | Open areas              | Indirect | Haddad et al., 2013; present study |
| <i>Elaschitocleis cesarii</i>         | 7121 | Nocturnal         | 3,2 | Non-toxic                | Fossorial | Open areas              | Indirect | Haddad et al., 2013; present study |
| <i>Elaschitocleis erythrogaster</i>   | 37   | Nocturnal         | 3,5 | Non-toxic                | Fossorial | Open areas              | Indirect | Haddad et al., 2013                |
| <i>Eleutherodactylus bilineatus</i>   | 550  | Nocturnal         | 2,6 | Non-toxic                | Fossorial | Forested areas          | Direct   | Haddad et al., 2013; present study |
| <i>Euparkerella brasiliensis</i>      | 369  | Diurnal/nocturnal | 1,7 | Non-toxic                | Cryptic   | Forested areas          | Direct   | Haddad et al., 2013                |
| <i>Euparkerella</i>                   | 186  | Diurnal/nocturnal | 1,6 | Non-toxic                | Cryptic   | Forested areas          | Direct   | Haddad et al., 2013; present study |

---

---

|                                  |      |                   |      |           |           |                |          |                                                                     |
|----------------------------------|------|-------------------|------|-----------|-----------|----------------|----------|---------------------------------------------------------------------|
| <i>cochranae</i>                 |      |                   |      |           |           |                |          |                                                                     |
| <i>Euparkerella cryptica</i>     | 2    | Diurnal/nocturnal | 1,9  | Non-toxic | Cryptic   | Forested areas | Direct   | Izecksohn 1998                                                      |
| <i>Euparkerella robusta</i>      | 2    | Diurnal/nocturnal | 2,3  | Non-toxic | Cryptic   | Forested areas | Direct   | Haddad et al., 2013                                                 |
| <i>Euparkerella tridactyla</i>   | 2    | Diurnal/nocturnal | 1,5  | Non-toxic | Cryptic   | Forested areas | Direct   | Haddad et al., 2013                                                 |
| <i>Fritziana fissilis</i>        | 934  | Nocturnal         | 2,8  | Non-toxic | Arboreal  | Forested areas | Indirect | Haddad et al., 2013; present study                                  |
| <i>Fritziana goeldii</i>         | 1825 | Nocturnal         | 3,7  | Non-toxic | Arboreal  | Forested areas | Indirect | Haddad et al., 2013                                                 |
| <i>Fritziana ohausi</i>          | 977  | Nocturnal         | 3,1  | Non-toxic | Arboreal  | Forested areas | Indirect | Haddad et al., 2013; present study                                  |
| <i>Frostius erythrophthalmus</i> | 435  | Nocturnal         | 2,3  | Toxic     | Fossorial | Forested areas | Indirect | Haddad et al., 2013; present study                                  |
| <i>Frostius pernambucensis</i>   | 1008 | Nocturnal         | 2,1  | Toxic     | Fossorial | Forested areas | Indirect | Haddad et al., 2013; present study                                  |
| <i>Gastrotheca albolineata</i>   | 703  | Nocturnal         | 6    | Non-toxic | Arboreal  | Forested areas | Direct   | Haddad et al., 2013; present study                                  |
| <i>Gastrotheca ernestoi</i>      | 321  | Nocturnal         | 6,9  | Non-toxic | Arboreal  | Forested areas | Direct   | Haddad et al., 2013                                                 |
| <i>Gastrotheca fissipes</i>      | 1550 | Nocturnal         | 7,2  | Non-toxic | Arboreal  | Forested areas | Direct   | Haddad et al., 2013                                                 |
| <i>Gastrotheca flamma</i>        | 1    | Nocturnal         | 5,5  | Non-toxic | Arboreal  | Forested areas | Direct   | Juncá & Nunes 2008                                                  |
| <i>Gastrotheca fulvorufa</i>     | 495  | Nocturnal         | 6,9  | Non-toxic | Arboreal  | Forested areas | Direct   | Haddad et al., 2013                                                 |
| <i>Gastrotheca megacephala</i>   | 895  | Nocturnal         | 10,1 | Non-toxic | Arboreal  | Forested areas | Direct   | Haddad et al., 2013; Lourenço-de-Moraes et al., 2016; present study |
| <i>Gastrotheca microdiscus</i>   | 1645 | Nocturnal         | 5,9  | Non-toxic | Arboreal  | Forested areas | Direct   | Haddad et al., 2013                                                 |
| <i>Gastrotheca prasina</i>       | 12   | Nocturnal         | 9,7  | Non-toxic | Arboreal  | Forested areas | Direct   | Haddad et al., 2013                                                 |
| <i>Gastrotheca pulchra</i>       | 5    | Nocturnal         | 3,3  | Non-toxic | Arboreal  | Forested areas | Direct   | Haddad et al., 2013                                                 |
| <i>Gastrotheca recava</i>        | 6    | Nocturnal         | 7,6  | Non-toxic | Arboreal  | Forested areas | Direct   | Haddad et al., 2013; Lourenço-de-Moraes et al., 2016; present study |
| <i>Haddadus</i>                  | 2    | Nocturnal         | 6,2  | Non-toxic | Cryptic   | Open areas     | Direct   | Haddad et al., 2013                                                 |

---

---

|                                |      |           |     |           |            |                         |          |                                                     |
|--------------------------------|------|-----------|-----|-----------|------------|-------------------------|----------|-----------------------------------------------------|
| <i>aramunha</i>                |      |           |     |           |            |                         |          |                                                     |
| <i>Haddadus binotatus</i>      | 4965 | Nocturnal | 6,5 | Non-toxic | Cryptic    | Forested areas          | Direct   | Haddad et al., 2013; present study                  |
| <i>Haddadus plicifer</i>       | 1    | Nocturnal | 1,7 | —         | —          | —                       | Direct   | Hedges et al., 2008                                 |
| <i>Holoaden bradei</i>         | 26   | —         | 2,5 | Toxic     | Cryptic    | Open and Forested areas | Direct   | Haddad et al., 2013                                 |
| <i>Holoaden luederwaldti</i>   | 473  | Nocturnal | 4,6 | Toxic     | Cryptic    | Forested areas          | Direct   | Haddad et al., 2013                                 |
| <i>Holoaden pholeter</i>       | 14   | Nocturnal | 4,6 | Toxic     | Cryptic    | Open and Forested areas | Direct   | Haddad et al., 2013                                 |
| <i>Hylodes amnicola</i>        | 8    | Diurnal   | 2,7 | Non-toxic | Rheophilic | Forested areas          | Indirect | Haddad et al., 2013                                 |
| <i>Hylodes asper</i>           | 967  | Diurnal   | 4,7 | Non-toxic | Rheophilic | Forested areas          | Indirect | Haddad et al., 2013; present study                  |
| <i>Hylodes babax</i>           | 32   | Diurnal   | 3,2 | Non-toxic | Rheophilic | Forested areas          | Indirect | Haddad et al., 2013                                 |
| <i>Hylodes cardosoi</i>        | 65   | Diurnal   | 4   | Non-toxic | Rheophilic | Forested areas          | Indirect | Haddad et al., 2013                                 |
| <i>Hylodes charadranaetes</i>  | 73   | Diurnal   | 4,3 | Non-toxic | Rheophilic | Forested areas          | Indirect | Haddad et al., 2013                                 |
| <i>Hylodes dactylocinus</i>    | 19   | Diurnal   | 2,7 | Non-toxic | Rheophilic | Forested areas          | Indirect | Haddad et al., 2013; present study                  |
| <i>Hylodes fredii</i>          | 1    | Diurnal   | 3,7 | Non-toxic | Rheophilic | Forested areas          | Indirect | Canedo & Pombal 2007                                |
| <i>Hylodes glaber</i>          | 7    | Diurnal   | 2,9 | Non-toxic | Rheophilic | Forested areas          | Indirect | Mir&a-Ribeiro 1926; Rocha et al., 2004 <sup>a</sup> |
| <i>Hylodes heyeri</i>          | 291  | Diurnal   | 4,3 | Non-toxic | Rheophilic | Forested areas          | Indirect | Haddad et al., 2013                                 |
| <i>Hylodes lateristrigatus</i> | 989  | Diurnal   | 3,5 | Non-toxic | Rheophilic | Forested areas          | Indirect | Haddad et al., 2013                                 |
| <i>Hylodes magalhaesi</i>      | 46   | Diurnal   | 3,4 | Non-toxic | Rheophilic | Forested areas          | Indirect | Haddad et al., 2013                                 |
| <i>Hylodes meridionalis</i>    | 102  | Diurnal   | 4,8 | Non-toxic | Rheophilic | Forested areas          | Indirect | Haddad et al., 2013; present study                  |
| <i>Hylodes mertensi</i>        | 8    | Diurnal   | 5,4 | Non-toxic | Rheophilic | Forested areas          | Indirect | Bokermann 1956; Rocha et al., 2004b                 |
| <i>Hylodes nasus</i>           | 1510 | Diurnal   | 3,8 | Non-toxic | Rheophilic | Forested areas          | Indirect | Haddad et al., 2013                                 |
| <i>Hylodes ornatus</i>         | 318  | Diurnal   | 2,7 | Non-toxic | Rheophilic | Forested areas          | Indirect | Haddad et al., 2013                                 |
| <i>Hylodes otavioi</i>         | 7    | Diurnal   | 3,4 | Non-toxic | Rheophilic | Forested areas          | Indirect | Haddad et al., 2013                                 |

---

|                                     |      |           |     |           |            |                            |          |                                                               |
|-------------------------------------|------|-----------|-----|-----------|------------|----------------------------|----------|---------------------------------------------------------------|
| <i>Hylodes perere</i>               | 30   | Diurnal   | 2,7 | Non-toxic | Rheophilic | Forested areas             | Indirect | Haddad et al., 2013                                           |
| <i>Hylodes<br/>perplicatus</i>      | 83   | Diurnal   | 4,4 | Non-toxic | Rheophilic | Forested areas             | Indirect | Haddad et al., 2013                                           |
| <i>Hylodes phyllodes</i>            | 468  | Diurnal   | 3   | Non-toxic | Rheophilic | Forested areas             | Indirect | Haddad et al., 2013                                           |
| <i>Hylodes pipilans</i>             | 5    | Diurnal   | 2,8 | Non-toxic | Rheophilic | Forested areas             | Indirect | Haddad et al., 2013; present study                            |
| <i>Hylodes regius</i>               | 61   | Diurnal   | 3,5 | Non-toxic | Rheophilic | Forested areas             | Indirect | Haddad et al., 2013                                           |
| <i>Hylodes sazimai</i>              | 228  | Diurnal   | 2,8 | Non-toxic | Rheophilic | Forested areas             | Indirect | Haddad et al., 2013                                           |
| <i>Hylodes uai</i>                  | 24   | Diurnal   | 3,8 | Non-toxic | Rheophilic | Forested areas             | Indirect | Nascimento et al., 2001; Nascimento & Pimenta 2010            |
| <i>Hylodes vanzolinii</i>           | 4    | Diurnal   | 2,9 | Non-toxic | Rheophilic | Forested areas             | Indirect | Heyer 1982; Heyer & Peixoto 2004                              |
| <i>Hylomantis aspera</i>            | 234  | Nocturnal | 4,4 | Toxic     | Arboreal   | Forested areas             | Indirect | Haddad et al., 2013                                           |
| <i>Hylomantis<br/>granulosa</i>     | 383  | Nocturnal | 4,8 | Toxic     | Arboreal   | Forested areas             | Indirect | Haddad et al., 2013                                           |
| <i>Hyophryne histrio</i>            | 9    | Nocturnal | 4,8 | —         | Cryptic    | Forested areas             | Indirect | Haddad et al., 2013                                           |
| <i>Ischnocnema lactea</i>           | 2020 | Nocturnal | 3,2 | Non-toxic | Cryptic    | Forested areas             | Direct   | Mir&a-Ribeiro 1923; Hedges et al., 2008; present study        |
| <i>Ischnocnema<br/>paranaesis</i>   | 1    | —         | 1,8 | Non-toxic | Cryptic    | Forested areas             | Direct   | Langone & Segalla 1996; Hedges et al., 2008                   |
| <i>Ischnocnema<br/>abdita</i>       | 23   | —         | 1,6 | Non-toxic | Cryptic    | Forested areas             | Direct   | Haddad et al., 2013                                           |
| <i>Ischnocnema<br/>bolbodactyla</i> | 410  | —         | 1,9 | Non-toxic | Cryptic    | Forested areas             | Direct   | Haddad et al., 2013                                           |
| <i>Ischnocnema<br/>concolor</i>     | 4    | Nocturnal | 2   | Non-toxic | Cryptic    | Open and<br>Forested areas | Direct   | Haddad et al., 2013                                           |
| <i>Ischnocnema<br/>epipeda</i>      | 2    | —         | 2,9 | Non-toxic | Cryptic    | Forested areas             | Direct   | Heyer 1984; Silvano & Peixoto 2004b                           |
| <i>Ischnocnema<br/>erythromera</i>  | 35   | Nocturnal | 3   | Non-toxic | Cryptic    | Forested areas             | Direct   | Haddad et al., 2013; present study                            |
| <i>Ischnocnema<br/>gehrti</i>       | 1    | —         | 1,5 | Non-toxic | Cryptic    | Forested areas             | Direct   | Pombal & Cruz 1999; Van Luiz & Cruz 2004; Hedges et al., 2008 |
| <i>Ischnocnema<br/>gualteri</i>     | 19   | —         | 4   | Non-toxic | Cryptic    | Forested areas             | Direct   | Lutz 1974; Carvalho-e-Silva et al., 2004; present study       |
| <i>Ischnocnema<br/>guentheri</i>    | 3635 | Nocturnal | 4   | Non-toxic | Fossorial  | Forested areas             | Direct   | Haddad et al., 2013; present study                            |



|                                 |      |           |     |           |           |                         |        |                                                                    |
|---------------------------------|------|-----------|-----|-----------|-----------|-------------------------|--------|--------------------------------------------------------------------|
| <i>Ischnocnema henselii</i>     | 1233 | Nocturnal | 3,6 | Non-toxic | Cryptic   | Forested areas          | Direct | Haddad et al., 2013; present study                                 |
| <i>Ischnocnema hoehnei</i>      | 422  | —         | 2,9 | Non-toxic | Fossorial | Forested areas          | Direct | Haddad et al., 2013                                                |
| <i>Ischnocnema holti</i>        | 6    | Nocturnal | 1,7 | Non-toxic | Fossorial | Open and Forested areas | Direct | Haddad et al., 2013                                                |
| <i>Ischnocnema izecksohni</i>   | 82   | —         | 4,7 | Non-toxic | Cryptic   | Forested areas          | Direct | Haddad et al., 2013                                                |
| <i>Ischnocnema juipoca</i>      | 2010 | —         | 2,3 | Non-toxic | Cryptic   | Open and Forested areas | Direct | Haddad et al., 2013                                                |
| <i>Ischnocnema karst</i>        | 7    | —         | 2,3 | Non-toxic | Cryptic   | Forested areas          | Direct | Haddad et al., 2013                                                |
| <i>Ischnocnema manezinho</i>    | 247  | Nocturnal | 3,3 | Non-toxic | Cryptic   | Forested areas          | Direct | Haddad et al., 2013                                                |
| <i>Ischnocnema melanopygia</i>  | 1    | —         | 2   | Non-toxic | Cryptic   | Forested areas          | Direct | Haddad et al., 2013                                                |
| <i>Ischnocnema nasuta</i>       | 3936 | —         | 3,9 | Non-toxic | Fossorial | Forested areas          | Direct | Haddad et al., 2013                                                |
| <i>Ischnocnema nigriventris</i> | 4    | —         | 1,9 | Non-toxic | Fossorial | Forested areas          | Direct | Haddad et al., 2013                                                |
| <i>Ischnocnema octavioi</i>     | 342  | —         | 3,2 | Non-toxic | Cryptic   | Forested areas          | Direct | Haddad et al., 2013                                                |
| <i>Ischnocnema oea</i>          | 2    | Nocturnal | 2,2 | Non-toxic | Cryptic   | Forested areas          | Direct | Haddad et al., 2013                                                |
| <i>Ischnocnema parva</i>        | 1423 | Nocturnal | 2   | Non-toxic | Cryptic   | Forested areas          | Direct | Haddad et al., 2013; present study                                 |
| <i>Ischnocnema pusilla</i>      | 11   | Nocturnal | 1,6 | Non-toxic | Cryptic   | Forested areas          | Direct | Bokermann 1967; Cruz & Carvalho-e-Silva 2004a; Hedges et al., 2008 |
| <i>Ischnocnema randorum</i>     | 5    | Nocturnal | 1,8 | Non-toxic | Cryptic   | Forested areas          | Direct | Haddad et al., 2013                                                |
| <i>Ischnocnema sambaqui</i>     | 34   | Nocturnal | 3,7 | Non-toxic | Cryptic   | Forested areas          | Direct | Haddad et al., 2013                                                |
| <i>Ischnocnema spanios</i>      | 190  | —         | 2,1 | Non-toxic | Cryptic   | Forested areas          | Direct | Haddad et al., 2013                                                |
| <i>Ischnocnema venancioi</i>    | 76   | —         | 2   | Non-toxic | Cryptic   | Forested areas          | Direct | Lutz 1958; Carvalho-e-Silva 2004 <sup>a</sup>                      |
| <i>Ischnocnema verrucosa</i>    | 855  | Nocturnal | 2,4 | Non-toxic | Cryptic   | Forested areas          | Direct | Haddad et al., 2013                                                |

|                                    |      |           |      |                          |             |                         |          |                                               |
|------------------------------------|------|-----------|------|--------------------------|-------------|-------------------------|----------|-----------------------------------------------|
| <i>Ischnocnema vizottoi</i>        | 40   | Nocturnal | 2    | Non-toxic                | Fossorial   | Forested areas          | Direct   | Haddad et al., 2013                           |
| <i>Itapotihyla langsdorffii</i>    | 4454 | Nocturnal | 10,3 | Unpalatable or bad odour | Arboreal    | Forested areas          | Indirect | Haddad et al., 2013; present study            |
| <i>Leptodactylus cupreus</i>       | 12   | Nocturnal | 5,7  | Non-toxic                | Cryptic     | Forested areas          | Indirect | Haddad et al., 2013                           |
| <i>Leptodactylus flavopictus</i>   | 1014 | Nocturnal | 13,2 | Toxic                    | Cryptic     | Forested areas          | Indirect | Haddad et al., 2013                           |
| <i>Leptodactylus furnarius</i>     | 3093 | Nocturnal | 4,2  | Non-toxic                | Aquatic     | Open areas              | Indirect | Haddad et al., 2013                           |
| <i>Leptodactylus fuscus</i>        | 9759 | Nocturnal | 4,4  | Non-toxic                | Terrestrial | Open areas              | Indirect | Haddad et al., 2013; present study            |
| <i>Leptodactylus gracilis</i>      | 3623 | Nocturnal | 4,4  | Non-toxic                | Cryptic     | Open areas              | Indirect | Haddad et al., 2013                           |
| <i>Leptodactylus hylodes</i>       | 2    | —         | 2,5  | —                        | —           | —                       | —        | Heyer 2000                                    |
| <i>Leptodactylus jolyi</i>         | 7    | Nocturnal | 5,4  | Non-toxic                | Terrestrial | Open areas              | Indirect | Haddad et al., 2013                           |
| <i>Leptodactylus labyrinthicus</i> | 4539 | Nocturnal | 15,5 | Toxic                    | Terrestrial | Open areas              | Indirect | Haddad et al., 2013; present study            |
| <i>Leptodactylus latrans</i>       | 9670 | Nocturnal | 9,6  | Toxic                    | Terrestrial | Open and Forested areas | Indirect | Haddad et al., 2013; present study            |
| <i>Leptodactylus macrosternum</i>  | 8302 | Nocturnal | 9    | Toxic                    | Terrestrial | Open and Forested areas | Indirect | Haddad et al., 2013                           |
| <i>Leptodactylus marambaiae</i>    | 4    | —         | 4,1  | —                        | —           | —                       | Indirect | Izecksohn 1976; Carvalho-e-Silva & Cruz 2004b |
| <i>Leptodactylus mystaceus</i>     | 830  | Nocturnal | 5,2  | Non-toxic                | Cryptic     | Forested areas          | Indirect | Haddad et al., 2013                           |
| <i>Leptodactylus mystacinus</i>    | 9605 | Nocturnal | 5,5  | Toxic                    | Terrestrial | Open areas              | Indirect | Haddad et al., 2013; present study            |
| <i>Leptodactylus natalensis</i>    | 2132 | Nocturnal | 5,2  | Non-toxic                | Cryptic     | Forested areas          | Indirect | Haddad et al., 2013; present study            |
| <i>Leptodactylus notoaktites</i>   | 2253 | Nocturnal | 5    | Non-toxic                | Cryptic     | Forested areas          | Indirect | Haddad et al., 2013; present study            |
| <i>Leptodactylus plaumanni</i>     | 2141 | Nocturnal | 3,8  | Non-toxic                | Cryptic     | Open areas              | Indirect | Haddad et al., 2013                           |

|                                     |      |           |      |           |              |                         |          |                                                          |
|-------------------------------------|------|-----------|------|-----------|--------------|-------------------------|----------|----------------------------------------------------------|
| <i>Leptodactylus podicipinus</i>    | 2529 | Nocturnal | 4,2  | Non-toxic | Cryptic      | Open areas              | Indirect | Haddad et al., 2013; present study                       |
| <i>Leptodactylus spixii</i>         | 3808 | Nocturnal | 5,2  | Non-toxic | Cryptic      | Forested areas          | Indirect | Haddad et al., 2013                                      |
| <i>Leptodactylus troglodytes</i>    | 1011 | Nocturnal | 5,1  | Non-toxic | Terrestrial  | Open areas              | Indirect | Haddad et al., 2013                                      |
| <i>Leptodactylus vastus</i>         | 886  | Nocturnal | 15   | Toxic     | Terrestrial  | Open areas              | Indirect | Haddad et al., 2013                                      |
| <i>Leptodactylus viridis</i>        | 234  | Nocturnal | 7,2  | Toxic     | Terrestrial  | Open areas              | Indirect | Haddad et al., 2013                                      |
| <i>Limnomedusa macroglossa</i>      | 1590 | Nocturnal | 5,4  | —         | Terrestrial  | Open and Forested areas | Indirect | Haddad et al., 2013                                      |
| <i>Lithobates catesbeianus</i>      | 1198 | Nocturnal | 8,9  | Non-toxic | Semi-aquatic | Open and Forested areas | Indirect | Haddad et al., 2013; present study                       |
| <i>Lithobates palmipes</i>          | 346  | Nocturnal | 11,3 | Non-toxic | Semi-aquatic | Open and Forested areas | Indirect | Haddad et al., 2013                                      |
| <i>Luetkenotyphlus brasiliensis</i> | 3313 | —         | 27   | —         | Fossorial    | Open and Forested areas | Direct   | Haddad et al., 2013                                      |
| <i>Macrogenioglottus alipioi</i>    | 2512 | Nocturnal | 9,1  | Toxic     | Cryptic      | Forested areas          | Indirect | Haddad et al., 2013; present study                       |
| <i>Megaelosia apuana</i>            | 2    | Diurnal   | 8,1  | Non-toxic | Rheophilic   | Forested areas          | Indirect | Pombal et al., 2003; Pombal 2004                         |
| <i>Megaelosia bocainensis</i>       | 5    | Diurnal   | 10,1 | Non-toxic | Rheophilic   | Forested areas          | Indirect | Haddad et al., 2013                                      |
| <i>Megaelosia boticariana</i>       | 3    | —         | 7,8  | Non-toxic | Rheophilic   | Forested areas          | Indirect | Haddad et al., 2013                                      |
| <i>Megaelosia goeldii</i>           | 451  | Diurnal   | 10   | Non-toxic | Rheophilic   | Forested areas          | Indirect | Haddad et al., 2013; present study                       |
| <i>Megaelosia lutzae</i>            | 7    | Diurnal   | 9,6  | Non-toxic | Rheophilic   | Forested areas          | Indirect | Izecksohn & Gouvêa 1987; Carvalho-e-Silva & Telles 2004b |
| <i>Megaelosia massarti</i>          | 38   | Diurnal   | 11,5 | Non-toxic | Rheophilic   | Forested areas          | Indirect | Haddad et al., 2013                                      |
| <i>Melanophryniscus admirabilis</i> | 7    | Diurnal   | 3,8  | Toxic     | Terrestrial  | Forested areas          | Indirect | Haddad et al., 2013                                      |
| <i>Melanophryniscus alipioi</i>     | 5    | Diurnal   | 2,5  | Toxic     | Phytotelmate | Open areas              | Indirect | Haddad et al., 2013; present study                       |

|                                         |      |                   |      |           |              |                         |          |                                                |
|-----------------------------------------|------|-------------------|------|-----------|--------------|-------------------------|----------|------------------------------------------------|
| <i>Melanophryniscus cambaraensis</i>    | 22   | Diurnal/nocturnal | 3,5  | Toxic     | Terrestrial  | Open and Forested areas | Indirect | Haddad et al., 2013                            |
| <i>Melanophryniscus dorsalis</i>        | 110  | Diurnal           | 2,5  | Toxic     | Terrestrial  | Open areas              | Indirect | Haddad et al., 2013                            |
| <i>Melanophryniscus macrogranulosus</i> | 2    | —                 | 3,5  | Toxic     | Terrestrial  | Forested areas          | Indirect | Haddad et al., 2013                            |
| <i>Melanophryniscus moreirae</i>        | 17   | Diurnal           | 2,9  | Toxic     | Terrestrial  | Open areas              | Indirect | Haddad et al., 2013                            |
| <i>Melanophryniscus peritus</i>         | 2    | Diurnal           | 4    | Toxic     | —            | —                       | Indirect | Caramaschi & Cruz 2011;                        |
| <i>Melanophryniscus setiba</i>          | 67   | Diurnal           | 1,5  | Toxic     | Cryptic      | Forested areas          | Indirect | Haddad et al., 2013                            |
| <i>Melanophryniscus simplex</i>         | 9    | Nocturnal         | 2,8  | Toxic     | Terrestrial  | Open areas              | Indirect | Haddad et al., 2013                            |
| <i>Melanophryniscus spectabilis</i>     | 1    | Diurnal           | 3,1  | Toxic     | Terrestrial  | Forested areas          | Indirect | Haddad et al., 2013                            |
| <i>Melanophryniscus tumifrons</i>       | 1480 | —                 | 3,1  | Toxic     | Terrestrial  | Open and Forested areas | Indirect | Haddad et al., 2013                            |
| <i>Melanophryniscus vilavelhensis</i>   | 13   | Nocturnal         | 1,7  | Toxic     | Phytotelmate | Open areas              | Indirect | Haddad et al., 2013                            |
| <i>Mimosiphonops vermiculatus</i>       | 4    | —                 | 18,7 | —         | Cryptic      | Forested areas          | Direct   | Taylor 1968; Silvano et al., 2004 <sup>a</sup> |
| <i>Myersiella microps</i>               | 1236 | Nocturnal         | 3,1  | Non-toxic | Fossorial    | Forested areas          | Direct   | Haddad et al., 2013; present study             |
| <i>Odontophrynus americanus</i>         | 8662 | Nocturnal         | 4,9  | Toxic     | Terrestrial  | Open areas              | Indirect | Haddad et al., 2013; present study             |
| <i>Odontophrynus carvalhoi</i>          | 657  | Nocturnal         | 6,7  | Toxic     | Terrestrial  | Open and Forested areas | Indirect | Haddad et al., 2013                            |
| <i>Odontophrynus maisuma</i>            | 8390 | Nocturnal         | 4,1  | Toxic     | Terrestrial  | Open areas              | Indirect | Haddad et al., 2013                            |
| <i>Ololygon agilis</i>                  | 825  | Diurnal/nocturnal | 1,8  | Non-toxic | Arboreal     | Open and Forested areas | Indirect | Haddad et al., 2013; present study             |
| <i>Ololygon albicans</i>                | 464  | Nocturnal         | 3    | Non-toxic | Arboreal     | Forested areas          | Indirect | Haddad et al., 2013; present study             |
| <i>Ololygon angrensis</i>               | 102  | Diurnal/nocturnal | 3,4  | Non-toxic | Arboreal     | Forested areas          | Indirect | Haddad et al., 2013                            |
| <i>Ololygon arduous</i>                 | 2    | Diurnal/nocturnal | 2,1  | Non-toxic | Phytotelmate | Forested areas          | Indirect | Haddad et al., 2013; present study             |

|                              |      |           |     |           |          |                            |          |                                             |
|------------------------------|------|-----------|-----|-----------|----------|----------------------------|----------|---------------------------------------------|
| <i>Ololygon argyromatus</i>  | 2218 | Nocturnal | 2,1 | Non-toxic | Arboreal | Forested areas             | Indirect | Haddad et al., 2013; present study          |
| <i>Ololygon ariadne</i>      | 60   | Nocturnal | 4,1 | Non-toxic | Arboreal | Forested areas             | Indirect | Haddad et al., 2013                         |
| <i>Ololygon aromothyella</i> | 10   | Nocturnal | 2,6 | Non-toxic | Arboreal | Open areas                 | Indirect | Haddad et al., 2013                         |
| <i>Ololygon atrata</i>       | 31   | ___       | 2   | Non-toxic | Arboreal | ___                        | Indirect | Peixoto 1989                                |
| <i>Ololygon belloni</i>      | 5    | Nocturnal | 3,9 | Non-toxic | Arboreal | Open and<br>Forested areas | Indirect | Haddad et al., 2013                         |
| <i>Ololygon brieni</i>       | 805  | Nocturnal | 3,5 | Non-toxic | Arboreal | Forested areas             | Indirect | Haddad et al., 2013                         |
| <i>Ololygon carnevallii</i>  | 960  | Nocturnal | 3,2 | Non-toxic | Arboreal | Forested areas             | Indirect | Haddad et al., 2013                         |
| <i>Ololygon catharinae</i>   | 716  | Nocturnal | 4,5 | Non-toxic | Arboreal | Forested areas             | Indirect | Haddad et al., 2013; present study          |
| <i>Ololygon cosenzai</i>     | 10   | Nocturnal | 2,3 | Non-toxic | Arboreal | Open areas                 | Indirect | Haddad et al., 2013                         |
| <i>Ololygon flavoguttata</i> | 1911 | Nocturnal | 4,5 | Non-toxic | Arboreal | Forested areas             | Indirect | Haddad et al., 2013; present study          |
| <i>Ololygon heyeri</i>       | 30   | Nocturnal | 3,9 | Non-toxic | Arboreal | Forested areas             | Indirect | Haddad et al., 2013                         |
| <i>Ololygon hiemalis</i>     | 964  | Nocturnal | 3,5 | Non-toxic | Arboreal | Forested areas             | Indirect | Haddad et al., 2013                         |
| <i>Ololygon humilis</i>      | 851  | Nocturnal | 2,6 | Non-toxic | Arboreal | Forested areas             | Indirect | Haddad et al., 2013                         |
| <i>Ololygon insperata</i>    | 5    | Nocturnal | 2,3 | Non-toxic | Arboreal | Forested areas             | Indirect | Haddad et al., 2013                         |
| <i>Ololygon jureia</i>       | 5    | Nocturnal | 3   | Non-toxic | Arboreal | Forested areas             | Indirect | Pombal & Gordo 1991; Rodrigues & Cruz 2004a |
| <i>Ololygon kautskyi</i>     | 1    | ___       | 2,8 | Non-toxic | Arboreal | Forested areas             | Indirect | Haddad et al., 2013                         |
| <i>Ololygon littoralis</i>   | 300  | Nocturnal | 3,8 | Non-toxic | Arboreal | Forested areas             | Indirect | Haddad et al., 2013; present study          |
| <i>Ololygon littoreus</i>    | 113  | Nocturnal | 2,2 | Non-toxic | Arboreal | Forested areas             | Indirect | Haddad et al., 2013                         |
| <i>Ololygon longilinea</i>   | 861  | Nocturnal | 4,2 | Non-toxic | Arboreal | Forested areas             | Indirect | Haddad et al., 2013                         |
| <i>Ololygon luizotavioi</i>  | 1178 | Nocturnal | 2,5 | Non-toxic | Arboreal | Forested areas             | Indirect | Haddad et al., 2013                         |
| <i>Ololygon machadoi</i>     | 908  | Nocturnal | 2,4 | Non-toxic | Arboreal | Open and<br>Forested areas | Indirect | Haddad et al., 2013                         |

|                                       |      |                   |     |           |             |                         |          |                                    |
|---------------------------------------|------|-------------------|-----|-----------|-------------|-------------------------|----------|------------------------------------|
| <i>Ololygon melloi</i>                | 19   | —                 | 1,9 | Non-toxic | Arboreal    | —                       | Indirect | Peixoto 1989; Cruz & Telles 2004   |
| <i>Ololygon obtriangulata</i>         | 1574 | Nocturnal         | 3,5 | Non-toxic | Arboreal    | Open and Forested areas | Indirect | Haddad et al., 2013                |
| <i>Ololygon peixotoi</i>              | 34   | Nocturnal         | 2,3 | Non-toxic | Arboreal    | Open and Forested areas | Indirect | Haddad et al., 2013                |
| <i>Ololygon perpusilla</i>            | 861  | Nocturnal         | 2   | Non-toxic | Arboreal    | Forested areas          | Indirect | Haddad et al., 2013; present study |
| <i>Ololygon ranki</i>                 | 76   | Nocturnal         | 2,3 | Non-toxic | Arboreal    | Forested areas          | Indirect | Haddad et al., 2013                |
| <i>Ololygon rizibilis</i>             | 1817 | Diurnal/nocturnal | 3   | Non-toxic | Arboreal    | Open and Forested areas | Indirect | Haddad et al., 2013                |
| <i>Ololygon strigilata</i>            | 310  | Nocturnal         | 3,8 | Non-toxic | Arboreal    | Forested areas          | Indirect | Haddad et al., 2013                |
| <i>Ololygon x-signata</i>             | 7889 | Nocturnal         | 4,1 | Non-toxic | Arboreal    | Open areas              | Indirect | Haddad et al., 2013; present study |
| <i>Osaecilia hypereumeces</i>         | 1    | —                 | 64  | —         | Cryptic     | Forested areas          | Direct   | Taylor 1968; Silvano et al., 2004b |
| <i>Paratelmatoobius cardosoi</i>      | 28   | Nocturnal         | 1,7 | —         | Cryptic     | Forested areas          | Indirect | Haddad et al., 2013                |
| <i>Paratelmatoobius gaigeae</i>       | 5    | Nocturnal         | 1,8 | —         | Cryptic     | Forested areas          | Indirect | Haddad et al., 2013                |
| <i>Paratelmatoobius lutzii</i>        | 2    | —                 | 2,4 | —         | Cryptic     | Open areas              | Indirect | Haddad et al., 2013                |
| <i>Paratelmatoobius mantiquera</i>    | 4    | —                 | 1,6 | —         | Terrestrial | Forested areas          | Indirect | Pombal & Haddad 1999               |
| <i>Paratelmatoobius poecilogaster</i> | 34   | Nocturnal         | 2,7 | —         | Cryptic     | Forested areas          | Indirect | Haddad et al., 2013                |
| <i>Paratelmatoobius yepiranga</i>     | 16   | Nocturnal         | 2,1 | —         | Cryptic     | Forested areas          | Indirect | Haddad et al., 2013                |
| <i>Phasmahyla cochranai</i>           | 1126 | Nocturnal         | 3,2 | Toxic     | Arboreal    | Forested areas          | Indirect | Haddad et al., 2013                |
| <i>Phasmahyla exilis</i>              | 438  | Nocturnal         | 2,9 | Toxic     | Arboreal    | Forested areas          | Indirect | Haddad et al., 2013                |
| <i>Phasmahyla guttata</i>             | 917  | Nocturnal         | 3,8 | Toxic     | Arboreal    | Forested areas          | Indirect | Haddad et al., 2013; present study |
| <i>Phasmahyla jandaia</i>             | 230  | Nocturnal         | 3,6 | Toxic     | Arboreal    | Forested areas          | Indirect | Haddad et al., 2013                |

|                                   |      |                   |     |           |              |                |          |                                                           |
|-----------------------------------|------|-------------------|-----|-----------|--------------|----------------|----------|-----------------------------------------------------------|
| <i>Phasmahyla spectabilis</i>     | 127  | Nocturnal         | 4,6 | Toxic     | Arboreal     | Forested areas | Indirect | Haddad et al., 2013                                       |
| <i>Phasmahyla timbo</i>           | 5    | Nocturnal         | 3,5 | Toxic     | Arboreal     | Forested areas | Indirect | Haddad et al., 2013                                       |
| <i>Phrynomedusa appendiculata</i> | 20   | ---               | 3,5 | Toxic     | Arboreal     | Forested areas | Indirect | Cruz 1991; Garcia et al., 2004                            |
| <i>Phrynomedusa bokermanni</i>    | 4    | ---               | 4,6 | Toxic     | Arboreal     | Forested areas | Indirect | Cruz ruz & Caramaschi 2004                                |
| <i>Phrynomedusa fimbriata</i>     | 4    | ---               | 4,5 | Toxic     | Arboreal     | Forested areas | Indirect | Cruz 1991; Cruz & Pimenta 2004                            |
| <i>Phrynomedusa marginata</i>     | 747  | Nocturnal         | 3,1 | Toxic     | Arboreal     | Forested areas | Indirect | Haddad et al., 2013                                       |
| <i>Phrynomedusa vanzolinii</i>    | 229  | ---               | 3,6 | Toxic     | Arboreal     | Forested areas | Indirect | Cruz 1991; Cruz & Carvalho-e-Silva 2004b                  |
| <i>Phyllodytes acuminatus</i>     | 996  | ---               | 2,4 | Non-toxic | Phytotelmate | Forested areas | Indirect | Haddad et al., 2013                                       |
| <i>Phyllodytes brevisrostris</i>  | 4    | ---               | 2,4 | Non-toxic | Phytotelmate | Forested areas | Indirect | Peixoto & Cruz 1998; Skuk et al., 2004                    |
| <i>Phyllodytes edelmoi</i>        | 196  | ---               | 2,6 | Non-toxic | Arboreal     | Forested areas | Indirect | Haddad et al., 2013                                       |
| <i>Phyllodytes gyrinaethes</i>    | 105  | ---               | 2,6 | Non-toxic | Arboreal     | Forested areas | Indirect | Haddad et al., 2013                                       |
| <i>Phyllodytes kautskyi</i>       | 657  | Diurnal/nocturnal | 4   | Non-toxic | Phytotelmate | Forested areas | Indirect | Haddad et al., 2013; present study                        |
| <i>Phyllodytes luteolus</i>       | 1671 | Nocturnal         | 2,5 | Non-toxic | Phytotelmate | Forested areas | Indirect | Haddad et al., 2013; present study                        |
| <i>Phyllodytes maculosus</i>      | 435  | Nocturnal         | 4,9 | Non-toxic | Phytotelmate | Forested areas | Indirect | Haddad et al., 2013; Ferreira et al., 2016; present study |
| <i>Phyllodytes melanomystax</i>   | 547  | Nocturnal         | 2,3 | Non-toxic | Phytotelmate | Forested areas | Indirect | Haddad et al., 2013; present study                        |
| <i>Phyllodytes punctatus</i>      | 1    | ---               | 2,1 | Non-toxic | Arboreal     | Forested areas | Indirect | Haddad et al., 2013                                       |
| <i>Phyllodytes tuberculosus</i>   | 42   | Nocturnal         | 2,4 | Non-toxic | Phytotelmate | Open areas     | Indirect | Haddad et al., 2013; present study                        |
| <i>Phyllodytes wuchereri</i>      | 615  | Nocturnal         | 2,7 | Non-toxic | Phytotelmate | Forested areas | Indirect | Haddad et al., 2013                                       |
| <i>Phyllomedusa</i>               | 337  | Nocturnal         | 7,5 | Toxic     | Arboreal     | Forested areas | Indirect | Haddad et al., 2013                                       |

---

|                                  |      |           |     |           |             |                         |          |                                                |  |
|----------------------------------|------|-----------|-----|-----------|-------------|-------------------------|----------|------------------------------------------------|--|
| <i>bahiana</i>                   |      |           |     |           |             |                         |          |                                                |  |
| <i>Phyllomedusa burmeisteri</i>  | 4892 | Nocturnal | 6   | Toxic     | Arboreal    | Open and Forested areas | Indirect | Haddad et al., 2013; present study             |  |
| <i>Phyllomedusa distincta</i>    | 1766 | Nocturnal | 6   | Toxic     | Arboreal    | Forested areas          | Indirect | Haddad et al., 2013; present study             |  |
| <i>Phyllomedusa iheringii</i>    | 47   | Nocturnal | 6,8 | Toxic     | Arboreal    | Open areas              | Indirect | Haddad et al., 2013                            |  |
| <i>Phyllomedusa nordestina</i>   | 1805 | Nocturnal | 3,7 | Toxic     | Arboreal    | Forested areas          | Indirect | Haddad et al., 2013; present study             |  |
| <i>Phyllomedusa rohdei</i>       | 2021 | Nocturnal | 4,6 | Toxic     | Arboreal    | Forested areas          | Indirect | Haddad et al., 2013; present study             |  |
| <i>Phyllomedusa tetraploidea</i> | 3440 | Nocturnal | 6,6 | Toxic     | Arboreal    | Open and Forested areas | Indirect | Haddad et al., 2013; present study             |  |
| <i>Physalaemus aguirrei</i>      | 976  | Nocturnal | 2,7 | Non-toxic | Cryptic     | Forested areas          | Indirect | Haddad et al., 2013                            |  |
| <i>Physalaemus angrensis</i>     | 2    | —         | 2   | Non-toxic | Cryptic     | Forested areas          | Indirect | Weber et al., 2006                             |  |
| <i>Physalaemus atlanticus</i>    | 1    | Nocturnal | 2,1 | Non-toxic | Cryptic     | Forested areas          | Indirect | Haddad et al., 2013                            |  |
| <i>Physalaemus barrioi</i>       | 6    | Nocturnal | 2,9 | Non-toxic | Terrestrial | Open areas              | Indirect | Haddad et al., 2013                            |  |
| <i>Physalaemus bokermanni</i>    | 4    | Nocturnal | 1,7 | Non-toxic | Cryptic     | Forested areas          | Indirect | Haddad et al., 2013                            |  |
| <i>Physalaemus caeté</i>         | 37   | —         | 2,5 | Non-toxic | Cryptic     | Forested areas          | Indirect | Pombal & Madureira 1997; Freire & Silvano 2004 |  |
| <i>Physalaemus camacan</i>       | 1    | Nocturnal | 2,4 | Non-toxic | Cryptic     | Forested areas          | Indirect | Haddad et al., 2013; present study             |  |
| <i>Physalaemus crombiei</i>      | 1267 | Nocturnal | 2,3 | Non-toxic | Terrestrial | Forested areas          | Indirect | Haddad et al., 2013                            |  |
| <i>Physalaemus cuvieri</i>       | 9704 | Nocturnal | 3,1 | Non-toxic | Terrestrial | Open areas              | Indirect | Haddad et al., 2013; present study             |  |
| <i>Physalaemus erikae</i>        | 222  | Nocturnal | 2,6 | Non-toxic | Terrestrial | Open and Forested areas | Indirect | Haddad et al., 2013                            |  |
| <i>Physalaemus feioi</i>         | 400  | Nocturnal | 2,8 | Non-toxic | Cryptic     | Forested areas          | Indirect | Haddad et al., 2013                            |  |
| <i>Physalaemus insperatus</i>    | 2    | —         | 2,6 | Non-toxic | Cryptic     | Forested areas          | Indirect | Cruz et al., 2008; Ângulo 2009                 |  |

---



|                                  |      |                   |     |           |         |                         |          |                                    |
|----------------------------------|------|-------------------|-----|-----------|---------|-------------------------|----------|------------------------------------|
| <i>Physalaemus irroratus</i>     | 6    | —                 | 2,3 | Non-toxic | Cryptic | Forested areas          | Indirect | Cruz et al., 2007                  |
| <i>Physalaemus jordanensis</i>   | 363  | Nocturnal         | 2,8 | Non-toxic | Cryptic | Open areas              | Indirect | Haddad et al., 2013                |
| <i>Physalaemus kroyeri</i>       | 769  | Nocturnal         | 2,9 | Non-toxic | Cryptic | Open areas              | Indirect | Haddad et al., 2013                |
| <i>Physalaemus lateristriga</i>  | 185  | Nocturnal         | 3,5 | Non-toxic | Cryptic | Forested areas          | Indirect | Haddad et al., 2013                |
| <i>Physalaemus lisei</i>         | 681  | Nocturnal         | 3   | Non-toxic | Cryptic | Open and Forested areas | Indirect | Haddad et al., 2013                |
| <i>Physalaemus maculiventris</i> | 1481 | Nocturnal         | 2,3 | Non-toxic | Cryptic | Forested areas          | Indirect | Haddad et al., 2013                |
| <i>Physalaemus maximus</i>       | 114  | Nocturnal         | 4,8 | Non-toxic | Cryptic | Forested areas          | Indirect | Haddad et al., 2013                |
| <i>Physalaemus moreirae</i>      | 86   | Nocturnal         | 2,6 | Non-toxic | Cryptic | Forested areas          | Indirect | Haddad et al., 2013                |
| <i>Physalaemus nanus</i>         | 573  | Nocturnal         | 2,1 | Non-toxic | Cryptic | Open and Forested areas | Indirect | Haddad et al., 2013                |
| <i>Physalaemus obtectus</i>      | 482  | Nocturnal         | 2,8 | Non-toxic | Cryptic | Forested areas          | Indirect | Haddad et al., 2013                |
| <i>Physalaemus olfersii</i>      | 2346 | Nocturnal         | 3,8 | Non-toxic | Cryptic | Forested areas          | Indirect | Haddad et al., 2013                |
| <i>Physalaemus signifer</i>      | 1688 | Nocturnal         | 2,2 | Non-toxic | Cryptic | Forested areas          | Indirect | Haddad et al., 2013; present study |
| <i>Physalaemus soaresi</i>       | 6    | Nocturnal         | 2,1 | Non-toxic | Cryptic | Forested areas          | Indirect | Haddad et al., 2013                |
| <i>Physalaemus spiniger</i>      | 286  | Nocturnal         | 2,2 | Non-toxic | Cryptic | Forested areas          | Indirect | Haddad et al., 2013                |
| <i>Pipa carvalhoi</i>            | 2152 | Diurnal/nocturnal | 5,5 | Non-toxic | Aquatic | Open areas              | Indirect | Haddad et al., 2013                |
| <i>Pristimantis paulodutraii</i> | 708  | Nocturnal         | 3,6 | Non-toxic | Cryptic | Forested areas          | Direct   | Haddad et al., 2013; present study |
| <i>Pristimantis ramagii</i>      | 1272 | Nocturnal         | 2,4 | Non-toxic | Cryptic | Forested areas          | Direct   | Haddad et al., 2013; present study |
| <i>Pristimantis vinhai</i>       | 763  | Nocturnal         | 2,5 | Non-toxic | Cryptic | Forested areas          | Direct   | Haddad et al., 2013; present study |
| <i>Proceratophrys</i>            | 1226 | Nocturnal         | 6,3 | Non-toxic | Cryptic | Forested areas          | Indirect | Haddad et al., 2013; present study |

---

|                                   |      |                   |     |           |         |                         |          |                                                  |  |
|-----------------------------------|------|-------------------|-----|-----------|---------|-------------------------|----------|--------------------------------------------------|--|
| <i>appendiculata</i>              |      |                   |     |           |         |                         |          |                                                  |  |
| <i>Proceratophrys avelinoi</i>    | 2412 | Nocturnal         | 2,6 | Non-toxic | Cryptic | Open and Forested areas | Indirect | Haddad et al., 2013; present study               |  |
| <i>Proceratophrys bigibbosa</i>   | 913  | Nocturnal         | 5,3 | Non-toxic | Cryptic | Forested areas          | Indirect | Haddad et al., 2013                              |  |
| <i>Proceratophrys boiei</i>       | 5334 | Nocturnal         | 5,7 | Non-toxic | Cryptic | Forested areas          | Indirect | Haddad et al., 2013; present study               |  |
| <i>Proceratophrys brauni</i>      | 410  | Diurnal/nocturnal | 3,9 | Non-toxic | Cryptic | Forested areas          | Indirect | Haddad et al., 2013                              |  |
| <i>Proceratophrys cristiceps</i>  | 722  | Nocturnal         | 6,4 | Non-toxic | Cryptic | Forested areas          | Indirect | Haddad et al., 2013                              |  |
| <i>Proceratophrys cururu</i>      | 1    | Nocturnal         | 5,4 | Non-toxic | Cryptic | Forested areas          | Indirect | Haddad et al., 2013                              |  |
| <i>Proceratophrys laticeps</i>    | 1287 | Nocturnal         | 6,7 | Non-toxic | Cryptic | Forested areas          | Indirect | Haddad et al., 2013; present study               |  |
| <i>Proceratophrys melanopogon</i> | 532  | Nocturnal         | 5,1 | Non-toxic | Cryptic | Forested areas          | Indirect | Haddad et al., 2013                              |  |
| <i>Proceratophrys minuta</i>      | 11   | Nocturnal         | 3   | Non-toxic | Cryptic | Forested areas          | Indirect | Haddad et al., 2013                              |  |
| <i>Proceratophrys moehringi</i>   | 66   | Nocturnal         | 6,3 | Non-toxic | Cryptic | Forested areas          | Indirect | Weygoldt & Peixoto 1985; Peixoto & Silvano 2004a |  |
| <i>Proceratophrys paviotii</i>    | 2    | Nocturnal         | 4,7 | Non-toxic | Cryptic | Forested areas          | Indirect | Haddad et al., 2013                              |  |
| <i>Proceratophrys phyllostoma</i> | 4    | Nocturnal         | 5,6 | Non-toxic | Cryptic | Forested areas          | Indirect | Izecksohn et al., 1999; Peixoto & Silvano 2004b  |  |
| <i>Proceratophrys renalis</i>     | 1366 | Nocturnal         | 5,5 | Non-toxic | Cryptic | Forested areas          | Indirect | Haddad et al., 2013; present study               |  |
| <i>Proceratophrys sanctaritae</i> | 10   | Nocturnal         | 4,1 | Non-toxic | Cryptic | Forested areas          | Indirect | Haddad et al., 2013                              |  |
| <i>Proceratophrys schirchi</i>    | 1531 | Nocturnal         | 5   | Non-toxic | Cryptic | Forested areas          | Indirect | Haddad et al., 2013                              |  |
| <i>Proceratophrys subguttata</i>  | 309  | Nocturnal         | 4,8 | Non-toxic | Cryptic | Forested areas          | Indirect | Haddad et al., 2013                              |  |
| <i>Pseudis bolbodactyla</i>       | 1951 | Nocturnal         | 4,5 | Non-toxic | Aquatic | Open areas              | Indirect | Haddad et al., 2013; present study               |  |
| <i>Pseudis cardosoi</i>           | 257  | Nocturnal         | 4,5 | Non-toxic | Aquatic | Open areas              | Indirect | Haddad et al., 2013                              |  |

---

|                                  |      |                   |      |           |             |                         |          |                                                                     |
|----------------------------------|------|-------------------|------|-----------|-------------|-------------------------|----------|---------------------------------------------------------------------|
| <i>Pseudis fusca</i>             | 221  | Nocturnal         | 4,1  | Non-toxic | Aquatic     | Open areas              | Indirect | Haddad et al., 2013                                                 |
| <i>Pseudis minuta</i>            | 795  | Nocturnal         | 3,7  | Non-toxic | Aquatic     | Open areas              | Indirect | Haddad et al., 2013                                                 |
| <i>Pseudis paradoxa</i>          | 1464 | Nocturnal         | 5,3  | Non-toxic | Aquatic     | Open areas              | Indirect | Haddad et al., 2013                                                 |
| <i>Pseudopaludicola falcipes</i> | 5436 | Diurnal/nocturnal | 1,8  | Non-toxic | Cryptic     | Open areas              | Indirect | Haddad et al., 2013                                                 |
| <i>Rhinella abei</i>             | 531  | Nocturnal         | 9,3  | Toxic     | Terrestrial | Open and Forested areas | Indirect | Haddad et al., 2013; present study                                  |
| <i>Rhinella achavali</i>         | 306  | Nocturnal         | 12   | Toxic     | Terrestrial | Open areas              | Indirect | Haddad et al., 2013                                                 |
| <i>Rhinella crucifer</i>         | 1943 | Nocturnal         | 10,1 | Toxic     | Terrestrial | Open and Forested areas | Indirect | Haddad et al., 2013; present study                                  |
| <i>Rhinella dorbignyi</i>        | 57   | Nocturnal         | 5,6  | Toxic     | Terrestrial | Open areas              | Indirect | Haddad et al., 2013                                                 |
| <i>Rhinella fernandezae</i>      | 971  | Nocturnal         | 5,7  | Toxic     | Terrestrial | Open areas              | Indirect | Haddad et al., 2013                                                 |
| <i>Rhinella granulosa</i>        | 8540 | Nocturnal         | 5,3  | Toxic     | Terrestrial | Open and Forested areas | Indirect | Haddad et al., 2013; present study                                  |
| <i>Rhinella henseli</i>          | 940  | Nocturnal         | 7    | Toxic     | Terrestrial | Open and Forested areas | Indirect | Haddad et al., 2013; present study                                  |
| <i>Rhinella hoogmoedi</i>        | 2257 | Nocturnal         | 5,6  | Toxic     | Terrestrial | Forested areas          | Indirect | Haddad et al., 2013; present study                                  |
| <i>Rhinella icterica</i>         | 7322 | Nocturnal         | 13,7 | Toxic     | Terrestrial | Open and Forested areas | Indirect | Haddad et al., 2013; present study                                  |
| <i>Rhinella Jimi</i>             | 2658 | Nocturnal         | 14,5 | Toxic     | Terrestrial | Open and Forested areas | Indirect | Haddad et al., 2013                                                 |
| <i>Rhinella ornata</i>           | 2158 | Nocturnal         | 7,9  | Toxic     | Terrestrial | Open and Forested areas | Indirect | Haddad et al., 2013; present study                                  |
| <i>Rhinella pygmaea</i>          | 305  | Nocturnal         | 4,1  | Toxic     | Terrestrial | Open areas              | Indirect | Haddad et al., 2013                                                 |
| <i>Rhinella diptycha</i>         | 9416 | Nocturnal         | 13   | Toxic     | Terrestrial | Open areas              | Indirect | Haddad et al., 2013; present study                                  |
| <i>Scinax alter</i>              | 3319 | Nocturnal         | 2,8  | Non-toxic | Arboreal    | Open areas              | Indirect | Haddad et al., 2013; present study                                  |
| <i>Scinax auratus</i>            | 956  | —                 | 2,6  | Non-toxic | Arboreal    | Open and Forested areas | Indirect | Haddad et al., 2013                                                 |
| <i>Scinax caldarum</i>           | 1052 | Nocturnal         | 2,9  | Non-toxic | Arboreal    | Open areas              | Indirect | Haddad et al., 2013                                                 |
| <i>Scinax cardosoi</i>           | 282  | —                 | 2,6  | Non-toxic | Arboreal    | —                       | Indirect | Carvalho-e-Silva & Peixoto 1991; Carvalho-e-Silva & Caramaschi 2004 |

|                               |      |           |      |           |           |                         |          |                                    |
|-------------------------------|------|-----------|------|-----------|-----------|-------------------------|----------|------------------------------------|
| <i>Scinax cretatus</i>        | 66   | Nocturnal | 3,2  | Non-toxic | Arboreal  | Open areas              | Indirect | Haddad et al., 2013                |
| <i>Scinax crospedospilus</i>  | 777  | Nocturnal | 3,1  | Non-toxic | Arboreal  | Forested areas          | Indirect | Haddad et al., 2013                |
| <i>Scinax cuspidatus</i>      | 2246 | Nocturnal | 3,1  | Non-toxic | Arboreal  | Open areas              | Indirect | Haddad et al., 2013                |
| <i>Scinax duartei</i>         | 1040 | Nocturnal | 3    | Non-toxic | Arboreal  | Open areas              | Indirect | Haddad et al., 2013                |
| <i>Scinax eurydice</i>        | 3145 | Nocturnal | 5,3  | Non-toxic | Arboreal  | Open areas              | Indirect | Haddad et al., 2013; present study |
| <i>Scinax fuscomarginatus</i> | 6859 | Nocturnal | 2,2  | Non-toxic | Arboreal  | Open areas              | Indirect | Haddad et al., 2013; present study |
| <i>Scinax fuscovarios</i>     | 9363 | Nocturnal | 4,5  | Non-toxic | Arboreal  | Open areas              | Indirect | Haddad et al., 2013; present study |
| <i>Scinax granulatus</i>      | 2971 | Nocturnal | 4,1  | Non-toxic | Arboreal  | Open areas              | Indirect | Haddad et al., 2013; present study |
| <i>Scinax hayii</i>           | 1965 | Nocturnal | 5,1  | Non-toxic | Arboreal  | Forested areas          | Indirect | Haddad et al., 2013; present study |
| <i>Scinax imbegue</i>         | 16   | Nocturnal | 3,2  | Non-toxic | Arboreal  | Open areas              | Indirect | Haddad et al., 2013                |
| <i>Scinax juncae</i>          | 23   | Nocturnal | 2,4  | Non-toxic | Arboreal  | Forested areas          | Indirect | Haddad et al., 2013                |
| <i>Scinax pachycrus</i>       | 820  | Nocturnal | 3,2  | Non-toxic | Arboreal  | Open areas              | Indirect | Haddad et al., 2013                |
| <i>Scinax perereca</i>        | 3047 | Nocturnal | 4,3  | Non-toxic | Arboreal  | Open and Forested areas | Indirect | Haddad et al., 2013; present study |
| <i>Scinax similis</i>         | 451  | Nocturnal | 3,8  | Non-toxic | Arboreal  | Open areas              | Indirect | Haddad et al., 2013; present study |
| <i>Scinax squalitostris</i>   | 8423 | Nocturnal | 2,7  | Non-toxic | Arboreal  | Open areas              | Indirect | Haddad et al., 2013                |
| <i>Scinax trapicheiroi</i>    | 239  | Nocturnal | 2,9  | Non-toxic | Arboreal  | Forested areas          | Indirect | Haddad et al., 2013                |
| <i>Scinax tymbamirim</i>      | 12   | Nocturnal | 2,6  | Non-toxic | Arboreal  | Open areas              | Indirect | Haddad et al., 2013                |
| <i>Scinax uruguayus</i>       | 1520 | Nocturnal | 2,8  | Non-toxic | Arboreal  | Open areas              | Indirect | Haddad et al., 2013                |
| <i>Scinax v-signatus</i>      | 767  | Nocturnal | 2,7  | Non-toxic | Arboreal  | Forested areas          | Indirect | Haddad et al., 2013; present study |
| <i>Scythroehrys sawayae</i>   | 226  | Nocturnal | 2,1  | Non-toxic | Cryptic   | Forested areas          | Indirect | Haddad et al., 2013                |
| <i>Siphonops annulatus</i>    | 8685 | —         | 45,4 | Toxic     | Fossorial | Open and Forested areas | Direct   | Haddad et al., 2013; present study |
| <i>Siphonops hardyi</i>       | 288  | —         | 17,8 | —         | Fossorial | Open and Forested areas | Direct   | Haddad et al., 2013                |

|                                    |      |           |      |           |              |                         |          |                                                |
|------------------------------------|------|-----------|------|-----------|--------------|-------------------------|----------|------------------------------------------------|
| <i>Siphonops insulanus</i>         | 19   | —         | 19   | —         | Fossorial    | Open and Forested areas | Direct   | Taylor 1968; Caramaschi et al., 2004           |
| <i>Siphonops paulensis</i>         | 8614 | —         | 30   | —         | Fossorial    | Open and Forested areas | Inirect  | Haddad et al., 2013                            |
| <i>Sphaenorhynchus botocudo</i>    | 13   | Nocturnal | 2,7  | Non-toxic | Aquatic      | Open areas              | Indirect | Haddad et al., 2013                            |
| <i>Sphaenorhynchus bromelicola</i> | 2    | Nocturnal | 2,8  | Non-toxic | Phytotelmate | Forested areas          | Indirect | Bokermann 1966; Silvano & Peixoto 2004c        |
| <i>Sphaenorhynchus caramaschii</i> | 846  | Nocturnal | 2,7  | Non-toxic | Aquatic      | Open and Forested areas | Indirect | Haddad et al., 2013                            |
| <i>Sphaenorhynchus mirim</i>       | 9    | Nocturnal | 1,7  | Non-toxic | Aquatic      | Open areas              | Indirect | Haddad et al., 2013                            |
| <i>Sphaenorhynchus orophilus</i>   | 732  | Nocturnal | 3,2  | Non-toxic | Arboreal     | Open and Forested areas | Indirect | Haddad et al., 2013                            |
| <i>Sphaenorhynchus palustres</i>   | 1398 | Nocturnal | 3,1  | Non-toxic | Arboreal     | Open and Forested areas | Indirect | Haddad et al., 2013                            |
| <i>Sphaenorhynchus pauloalvini</i> | 424  | Nocturnal | 1,9  | Non-toxic | Arboreal     | Forested areas          | Indirect | Haddad et al., 2013                            |
| <i>Sphaenorhynchus planicola</i>   | 1008 | Nocturnal | 2    | Non-toxic | Arboreal     | Open and Forested areas | Indirect | Haddad et al., 2013                            |
| <i>Sphaenorhynchus prasinus</i>    | 2031 | Nocturnal | 2,8  | Non-toxic | Arboreal     | Open and Forested areas | Indirect | Haddad et al., 2013                            |
| <i>Sphaenorhynchus surdus</i>      | 1046 | Nocturnal | 2,8  | Non-toxic | Aquatic      | Open and Forested areas | Indirect | Haddad et al., 2013                            |
| <i>Stereocyclops incrassatus</i>   | 2051 | Nocturnal | 6,2  | Non-toxic | Cryptic      | Forested areas          | Indirect | Haddad et al., 2013                            |
| <i>Stereocyclops parkeri</i>       | 258  | Nocturnal | 6    | Non-toxic | Cryptic      | Forested areas          | Indirect | Haddad et al., 2013                            |
| <i>Thoropa lutzi</i>               | 703  | Nocturnal | 2,6  | Non-toxic | Terrestrial  | Forested areas          | Indirect | Haddad et al., 2013                            |
| <i>Thoropa miliaris</i>            | 3966 | Nocturnal | 6,3  | Non-toxic | Terrestrial  | Forested areas          | Indirect | Haddad et al., 2013; present study             |
| <i>Thoropa petropolitana</i>       | 209  | —         | 7,5  | —         | Terrestrial  | Forested areas          | Indirect | Cochrann 1955; Carvalho-e-Silva & Peixoto 2004 |
| <i>Thoropa saxatilis</i>           | 145  | Nocturnal | 5,9  | Non-toxic | Terrestrial  | Forested areas          | Indirect | Haddad et al., 2013                            |
| <i>Thoropa taophora</i>            | 499  | Nocturnal | 6,3  | Non-toxic | Terrestrial  | Forested areas          | Indirect | Haddad et al., 2013                            |
| <i>Trachycephalus</i>              | 323  | Nocturnal | 10,7 | Toxic     | Arboreal     | Open areas              | Indirect | Haddad et al., 2013                            |

---

| <i>atlas</i>                         |      |                   |     |           |          |                         |          |                                          |
|--------------------------------------|------|-------------------|-----|-----------|----------|-------------------------|----------|------------------------------------------|
| <i>Trachycephalus dibernardoi</i>    | 809  | Nocturnal         | 7,8 | Toxic     | Arboreal | Forested areas          | Indirect | Haddad et al., 2013                      |
| <i>Trachycephalus imitatrix</i>      | 2792 | Nocturnal         | 7,1 | Toxic     | Arboreal | Forested areas          | Indirect | Haddad et al., 2013                      |
| <i>Trachycephalus lepidus</i>        | 4    | Nocturnal         | 5,9 | Toxic     | Arboreal | Forested areas          | Indirect | Haddad et al., 2013                      |
| <i>Trachycephalus mesophaeus</i>     | 5477 | Diurnal/nocturnal | 6,9 | Toxic     | Arboreal | Forested areas          | Indirect | Haddad et al., 2013; present study       |
| <i>Trachycephalus nigromaculatus</i> | 3490 | Nocturnal         | 9,2 | Toxic     | Arboreal | Forested areas          | Indirect | Haddad et al., 2013                      |
| <i>Trachycephalus typhoni</i>        | 4913 | Nocturnal         | 9,2 | Toxic     | Arboreal | Open and Forested areas | Indirect | Haddad et al., 2013; present study       |
| <i>Vitreorana eurygnatha</i>         | 4334 | Nocturnal         | 2,4 | Non-toxic | Arboreal | Forested areas          | Indirect | Haddad et al., 2013; present study       |
| <i>Vitreorana uranoscopa</i>         | 5065 | Nocturnal         | 2,7 | Non-toxic | Arboreal | Forested areas          | Indirect | Haddad et al., 2013; present study       |
| <i>Xenohyla eugenioi</i>             | 147  | Nocturnal         | 4,5 | —         | Arboreal | Open and Forested areas | Indirect | Caramaschi 1998; Silvano & Pimenta 2004a |
| <i>Xenohyla truncata</i>             | 218  | Nocturnal         | 5   | —         | Arboreal | Forested areas          | Indirect | Haddad et al., 2013                      |
| <i>Zachaenus carvalhoi</i>           | 2    | Nocturnal         | 2,8 | Non-toxic | Cryptic  | Forested areas          | Indirect | Haddad et al., 2013                      |
| <i>Zachaenus parvulus</i>            | 268  | Nocturnal         | 2,9 | Non-toxic | Cryptic  | Forested areas          | Indirect | Haddad et al., 2013; present study       |

---

**TABLE 1.2** Specific functions, ecosystem supporting services and references related to the amphibian functional traits assessed in the Brazilian Atlantic Forest.

| <b>Functional traits</b>                                                                                          | <b>Specific functions</b>                                                           | <b>Ecosystem supporting services</b>                                                                                       | <b>References</b>                                                                                    |
|-------------------------------------------------------------------------------------------------------------------|-------------------------------------------------------------------------------------|----------------------------------------------------------------------------------------------------------------------------|------------------------------------------------------------------------------------------------------|
| Body size (mm)                                                                                                    | Hunting tolerance, dispersal ability, predator-prey relationships, sexual selection | Trophic transfer, nutrient cycling, protection of primary productivity by controlling herbivores                           | Duellman & Trueb 1994, Wells, 2007, Toledo et al., 2007, Haddad et al., 2013, Hocking & Babbitt 2014 |
| Activity time (subtraits: nocturnal, diurnal, and both)                                                           | Dispersal ability, predator-prey relationships, sexual selection                    | Trophic transfer, nutrient cycling                                                                                         | Duellman & Trueb 1994, Wells, 2007, Haddad et al., 2013, Hocking & Babbitt 2014                      |
| Toxicity (subtraits: toxic, non-toxic, unpalatable or bad odor, and no poison)                                    | Hunting tolerance, predator-prey relationships                                      | Trophic transfer, nutrient cycling                                                                                         | Duellman & Trueb 1994, Wells, 2007, Haddad et al., 2013, Hocking & Babbitt 2014                      |
| Habitat (subtraits: forested area, open area, and both)                                                           | Dispersal ability, predator-prey relationships                                      | Trophic transfer, faunal food chains, nutrient cycling, soil bioturbation, ecosystem engineering                           | Duellman & Trueb 1994, Wells, 2007, Haddad et al., 2013, Hocking & Babbitt 2014                      |
| Habit (subtraits: arboreal, phytotelmate, terrestrial, cryptic, fossorial, rheophilic, semi-aquatic, and aquatic) | Dispersal ability, predator-prey relationships                                      | Trophic transfer, faunal food chains, soil bioturbation, ecosystem engineering, decomposition (tadpoles), nutrient cycling | Duellman & Trueb 1994, Wells, 2007, Haddad et al., 2013, Hocking & Babbitt 2014                      |
| Reproductive mode (subtraits: direct or indirect)                                                                 | Dispersal ability, predator-prey relationships, sexual selection                    | Trophic transfer, faunal food chains, nutrient cycling, soil bioturbation, decomposition (tadpoles), ecosystem engineering | Duellman & Trueb 1994, Haddad & Prado 2005, Wells, 2007, Haddad et al., 2013, Hocking & Babbitt 2014 |

## Reference

- Angulo, A. (2008). *Chiasmocleis sapiranga*. The IUCN Red List of Threatened Species 2008: e.T136127A4245064.<http://dx.doi.org/10.2305/IUCN.UK.2008.RLTS.T136127A4245064.en>. Downloaded on 18 July 2016.
- Angulo, A. (2008). *Crossodactylus cyclospinus*. The IUCN Red List of Threatened Species 2008: e.T136178A4255660.<http://dx.doi.org/10.2305/IUCN.UK.2008.RLTS.T136178A4255660.en>. Downloaded on 19 July 2016.
- Angulo, A. (2009). *Physalaemus insperatus*. The IUCN Red List of Threatened Species 2009: e.T158537A5209849. <http://dx.doi.org/10.2305/IUCN.UK.2009-2.RLTS.T158537A5209849.en>. Downloaded on 19 July 2016.
- Bokermann, W.C.A. (1951). Sinopse das espécies brasileiras do género *Cycloramphus* Tschudi, 1838 (Amphibia, Salientia—Leptodactylidae). *Arquivos do Museu Nacional. Rio de Janeiro* 42,77–106.
- Bokermann, W.C.A. (1956). Una nueva especie del genero *Elosia* del sudeste del Brasil (Amphibia Salientia, Leptodactylidae). *Neotropica. La Plata*, 2, 81–84.
- Bokermann, W.C.A. (1957). Sobre uma nova espécie de *Cycloramphus* do Estado de Santa Catarina, Brasil. *Revista Brasileira de Biologia*, 17, 249–252.
- Bokermann, W.C.A. (1962). Cuatro nuevos hylidos del Brasil. *Neotropica. La Plata*, 8, 81–92.
- Bokermann, W.C.A. (1963). Una nueva especie de *Hyla* del sudeste Brasileño. *Neotropica. La Plata*, 9, 27–30.
- Bokermann, W.C.A. (1965). *Hyla langei*, a new frog from Paraná, southern Brasil. *Journal of the Ohio Herpetological Society*, 5, 49–51.
- Bokermann, W.C.A. (1966). Duas novas especies de *Sphaenorhynchus* (Amphibia, Hylidae). *Revista Brasileira de Biologia*, 26,15–21.
- Bokermann, W.C.A. (1967). Una nueva especie de *Eleutherodactylus* del sudeste brasileño (Amphibia, Leptodactylidae). *Neotropica. La Plata*, 13, 1–3.



- Canedo, C. & Pombal Jr., J.P. (2007). Two new species of torrent frog of the genus *Hylodes* (Anura, Hylodidae) with nuptial thumb tubercles. *Herpetologica*, 63, 224–235.
- Carvalho-e-Silva, S.P. & Peixoto, O.L. (1991). Duas novas espécies de *Oloolygon* para os Estados do Rio de Janeiro e Espírito Santo (Amphibia, Anura, Hylidae). *Revista Brasileira de Biologia*, 51, 263–270.
- Carvalho-e-Silva, S.P. & Rodrigues, M.T. (2004). *Dendropsophus limai*. The IUCN Red List of Threatened Species 2004: e.T55539A11329277.<http://dx.doi.org/10.2305/IUCN.UK.2004.RLTS.T55539A11329277.en>. Downloaded on 19 July 2016.
- Carvalho-e-Silva, S.P. & Caramaschi, U. (2004). *Bokermannohyla claresignata*. The IUCN Red List of Threatened Species 2004: e.T55452A11313813.<http://dx.doi.org/10.2305/IUCN.UK.2004.RLTS.T55452A11313813.en>. Downloaded on 18 July 2016.
- Carvalho-e-Silva, A.P. & Telles A.M. (2004a). *Bokermannohyla clepsydra*. The IUCN Red List of Threatened Species 2004: e.T55453A11313946.<http://dx.doi.org/10.2305/IUCN.UK.2004.RLTS.T55453A11313946.en>. Downloaded on 18 July 2016.
- Carvalho-e-Silva, S.P., Telles, A.M. & Cruz, C.A.G. (2004). *Ischnocnema gualteri*. The IUCN Red List of Threatened Species 2004: e.T56635A11511212.<http://dx.doi.org/10.2305/IUCN.UK.2004.RLTS.T56635A11511212.en>. Downloaded on 19 July 2016.
- Carvalho-e-Silva, S.P. & Cruz, C.A.G. (2004a). *Ischnocnema venancioi*. The IUCN Red List of Threatened Species 2004: e.T57033A11571923.<http://dx.doi.org/10.2305/IUCN.UK.2004.RLTS.T57033A11571923.en>. Downloaded on 19 July 2016.
- Carvalho-e-Silva, S.P. & Cruz, C.A.G. (2004b). *Leptodactylus marambaiae*. The IUCN Red List of Threatened Species 2004: e.T11663A3301123.<http://dx.doi.org/10.2305/IUCN.UK.2004.RLTS.T11663A3301123.en>. Downloaded on 19 July 2016.
- Carvalho-e-Silva, S.P. & Telles, A.M. (2004b). *Megaelosia lutzae*. The IUCN Red List of Threatened Species 2004: e.T57183A11582381.<http://dx.doi.org/10.2305/IUCN.UK.2004.RLTS.T57183A11582381.en>. Downloaded on 19 July 2016.
- Carvalho-e-Silva, S.P. & Peixoto, O.L. (2004). *Thoropa petropolitana*. The IUCN Red List of Threatened Species 2004: e.T21817A9322082.<http://dx.doi.org/10.2305/IUCN.UK.2004.RLTS.T21817A9322082.en>. Downloaded on 19 July 2016.

- Caramaschi, U. (1998). Description of a second species of the genus *Xenohyla* (Anura: Hylidae). *Amphibia-Reptilia*, 19, 377–384.
- Caramaschi, U. & Pimenta, B.V.S. (2003). Duas novas espécies de *Chiasmocleis* Méhelÿ, 1904, da Mata Atlântica do Sul da Bahia, Brasil (Amphibia, Anura, Microhylidae). *Arquivos do Museu Nacional. Rio de Janeiro*, 61, 195–202.
- Caramaschi, U., Rodrigues, M.T. & Wilkinson, M. (2004). *Siphonops insulanus*. The IUCN Red List of Threatened Species 2004: e.T59595A11957925.<http://dx.doi.org/10.2305/IUCN.UK.2004.RLTS.T59595A11957925.en>. Downloaded on 19 July 2016.
- Caramaschi, U. & Pimenta, B. (2004). *Chiasmocleis cordeiroi*. The IUCN Red List of Threatened Species 2004: e.T57755A11680972.<http://dx.doi.org/10.2305/IUCN.UK.2004.RLTS.T57755A11680972.en>. Downloaded on 18 July 2016.
- Caramaschi, U. & Cruz, C.A.G. (2011). A new, possibly threatened species of *Melanophryniscus* Gallardo, 1961 from the state of Minas Gerais, southeastern Brazil (Amphibia, Anura, Bufonidae). *Boletim do Museu Nacional. Nova Serie, Zoologia. Rio de Janeiro*, 528, 1–9.
- Carcerelli, L.C. & Caramaschi, U. (1993 "1992"). Ocorrência do gênero *Crossodactylus* Duméril & Bibron, 1841 no nordeste brasileiro, com descrição de duas espécies novas (Amphibia, Anura, Leptodactylidae). *Revista Brasileira de Biologia*, 52, 415–422.
- Cochran, D.M. (1938). Diagnoses of new frogs from Brazil. *Proceedings of the Biological Society of Washington*, 51, 41–42.
- Cochran, D.M. (1955 "1954"). Frogs of southeastern Brazil. *Bulletin of the United States National Museum*, 206, 1–423.
- Cruz, C.A.G. (1991 "1990"). Sobre as relações intergenericas de Phyllomedusinae da Floresta Atlântica (Amphibia, Anura, Hylidae). *Revista Brasileira de Biologia*, 50, 709–726.
- Cruz, C.A.G., Carvalho-e-Silva, S.P. & Telles, A.M. (2004). *Aplastodiscus musicus*. The IUCN Red List of Threatened Species 2004: e.T55572A11319411.<http://dx.doi.org/10.2305/IUCN.UK.2004.RLTS.T55572A11319411.en>. Downloaded on 18 July 2016.
- Cruz, C.A.G. & Carvalho-e-Silva, S.P. (2004a). *Ischnocnema pusilla*. The IUCN Red List of Threatened Species 2004: e.T56889A11538761.<http://dx.doi.org/10.2305/IUCN.UK.2004.RLTS.T56889A11538761.en>. Downloaded on 19 July 2016.

- Cruz, C.A.G. & Telles, A.M. (2004). *Scinax melloi*. The IUCN Red List of Threatened Species 2004:  
e.T55979A11389652.<http://dx.doi.org/10.2305/IUCN.UK.2004.RLTS.T55979A11389652.en>. Downloaded on 19 July 2016.
- Cruz, C.A.G. & Caramaschi, U. (2004). *Phrynomedusa bokermanni*. The IUCN Red List of Threatened Species 2004:  
e.T55826A11374546.<http://dx.doi.org/10.2305/IUCN.UK.2004.RLTS.T55826A11374546.en>. Downloaded on 19 July 2016.
- Cruz, C.A.G. & Pimenta, B. (2004). *Phrynomedusa fimbriata*. The IUCN Red List of Threatened Species 2004:  
e.T17078A6797217.<http://dx.doi.org/10.2305/IUCN.UK.2004.RLTS.T17078A6797217.en>. Downloaded on 19 July 2016.
- Cruz, C.A.G. & Carvalho-e-Silva, S.P. (2004b). *Phrynomedusa vanzolinii*. The IUCN Red List of Threatened Species 2004:  
e.T55828A11375261.<http://dx.doi.org/10.2305/IUCN.UK.2004.RLTS.T55828A11375261.en>. Downloaded on 19 July 2016.
- Cruz, C.A.G., Caramaschi, U. & Napoli, M.F. (2007). A new species of *Chiasmocleis* (Anura, Microhylidae) from the Atlantic Rain Forest of northeastern Bahia, Brazil. *South American Journal of Herpetology*, 2, 47–51.
- Cruz, C. A. G., Nascimento, L. B. & Feio, R. N. (2007). A new species of the genus *Physalaemus* Fitzinger, 1826 (Anura, Leiuperidae) from southeastern Brazil. *Amphibia-Reptilia*, 28, 457–465.
- Cruz, C. A. G., Cassini, C. S. & Caramaschi, U. (2008). A new species of the genus *Physalaemus* Fitzinger, 1826 (Anura, Leiuperidae) from southern Brazil. *South American Journal of Herpetology*, 3, 239–243.
- Duellman, W.E. & Trueb, L. (1994). *Biology of Amphibians*. Baltimore: The Johns Hopkins University Press.
- Freire, E. M. X. & Silvano, D. (2004). *Physalaemus caete*. The IUCN Red List of Threatened Species 2004:  
e.T57244A11608073.<http://dx.doi.org/10.2305/IUCN.UK.2004.RLTS.T57244A11608073.en>. Downloaded on 19 July 2016.
- Garcia, P. & Rodrigues, M. T. (2004). *Boana cymbalum*. The IUCN Red List of Threatened Species 2004:  
e.T55461A11300769.<http://dx.doi.org/10.2305/IUCN.UK.2004.RLTS.T55461A11300769.en>. Downloaded on 19 July 2016.

- Garcia, P., Segalla, M. V. & Silvano, D. (2004). *Phrynomedusa appendiculata*. The IUCN Red List of Threatened Species 2004: e.T55825A11374203.<http://dx.doi.org/10.2305/IUCN.UK.2004.RLTS.T55825A11374203.en>. Downloaded on 19 July 2016.
- Gomes, M. R. & Peixoto, O. L. (1996). Nova especie de *Hyla* do group marmorata de Sergipe, nordeste do Brasil (Amphibia, Anura, Hylidae). *Iheringia. Série Zoologia*, 80, 33–38.
- Haddad, C.F.B. & Prado, C.P.A. (2005). Reproductive modes in frogs and their unexpected diversity in the Atlantic forest of Brazil. *BioScience*, 55, 207–217.
- Haddad, C.F.B., Toledo, L.F., Prado, C.P.A., Loebmann, D., Gasparini, J.L. & Sazima, I. (2013). *Guia dos anfíbios da Mata Atlântica: diversidade e biologia*. Anolis Books, São Paulo.
- Hedges, S.B., Duellman, W.E. & Heinicke, M.P. (2008). New world direct-developing frogs (Anura: Terrarana): molecular phylogeny, classification, biogeography, and conservation. *Zootaxa*, 1737, 1–182.
- Heyer, W.R. (1982). Two new species of the frog genus *Hylodes* from Caparaó, Minas Gerais, Brasil (Amphibia: Leptodactylidae). *Proceedings of the Biological Society of Washington*, 95, 377–385.
- Heyer, W.R. (1983). Notes on the frog genus *Cycloramphus* (Amphibia: Leptodactylidae), with descriptions of two new species. *Proceedings of the Biological Society of Washington*, 96, 548–559.
- Heyer, W.R. (1984). Variation, systematics, and zoogeography of *Eleutherodactylus guentheri* and closely related species (Amphibia: Anura: Leptodactylidae). *Smithsonian Contributions to Zoology*, 402, 1–42.
- Heyer, W.R. (2000). The lectotype of *Cystignathus hylodes* Reinhardt and Lütken. *Journal of Herpetology*, 34, 150–153.
- Heyer, R., Silvano, D. & Pimenta, B. (2004). *Cycloramphus asper*. The IUCN Red List of Threatened Species 2004: e.T56357A11452151.<http://dx.doi.org/10.2305/IUCN.UK.2004.RLTS.T56357A11452151.en>. Downloaded on 19 July 2016.

- Heyer, R. & D. Silvano. (2004a). *Cycloramphus cedrensis*. The IUCN Red List of Threatened Species 2004: e.T56364A11467624.<http://dx.doi.org/10.2305/IUCN.UK.2004.RLTS.T56364A11467624.en>. Downloaded on 19 July 2016.
- Heyer, R., Garcia, P. & Silvano, D. (2004). *Cycloramphus diringshofeni*. The IUCN Red List of Threatened Species 2004: e.T56365A11467731.<http://dx.doi.org/10.2305/IUCN.UK.2004.RLTS.T56365A11467731.en>. Downloaded on 19 July 2016.
- Heyer, R. & Silvano, D. (2004b). *Cycloramphus mirandaribeiroi*. The IUCN Red List of Threatened Species 2004: e.T56376A11455638.<http://dx.doi.org/10.2305/IUCN.UK.2004.RLTS.T56376A11455638.en>. Downloaded on 19 July 2016.
- Heyer, R. & Peixoto, O. L. (2004). *Hylodes vanzolinii*. The IUCN Red List of Threatened Species 2004: e.T57103A11578875.<http://dx.doi.org/10.2305/IUCN.UK.2004.RLTS.T57103A11578875.en>. Downloaded on 19 July 2016.
- Hocking, D. J. & Babbitt, K. J. (2014). Amphibian contributions to ecosystem services. *Herpetological Conservation & Biology*, 9:1–17.
- Izecksohn, E. (1976). Uma nova espécie de *Leptodactylus* do Estado do Rio de Janeiro, Brasil (Amphibia, Anura, Leptodactylidae). *Revista Brasileira de Biologia*, 36, 527–530.
- Izecksohn, E. (1988). Algumas considerações sobre o gênero *Euparkerella*, com a descrição de três novas espécies (Amphibia, Anura, Leptodactylidae). *Revista Brasileira de Biologia*, 48, 59–74.
- Izecksohn, E. & Gouvêa, É. (1987 "1985"). Nova espécie de *Megaelosia* de Itatiaia, Estado do Rio de Janeiro. *Arquivos de Universidade Federal Rural do Rio de Janeiro*, 8, 17–22.
- Izecksohn, E. (1994 "1993"). Três novas espécies de *Dendrophryniscus* Jiménez de la Espada das regiões sudeste e sul do Brasil (Amphibia, Anura, Bufonidae). *Revista Brasileira de Zoologia*, 10, 473–488.
- Izecksohn, E., Cruz, C. A. G. & Peixoto, O. L. (1999 "1998"). Sobre *Proceratophrys appendiculata* algumas espécies afins (Amphibia: Anura: Leptodactylidae). *Revista da Universidade Rural, Série Ciencia da Vida*, 20, 37–54.

- Juncá, F. A., & Nunes, I. (2008). A new species of marsupial frog of the genus *Gastrotheca* Fitzinger (Anura: Amphignatodontidae) from the state of Bahia, northeastern Brazil. *Zootaxa*, 1907, 61–68.
- Langone, J. A. & Segalla, M. V. (1996). Una nueva especie de *Eleutherodactylus* del Estado de Paraná, Brasil. *Comunicaciones Zoológicas del Museo de Historia Natural de Montevideo*, 12, 1–5.
- Lourenço-de-Moraes, R., Solé, M. & Toledo, L.F. (2012a). A new species of *Adelophryne* Hoogmoed and Lescure 1984 (Amphibia: Anura: Eleutherodactylidae) from the Atlantic rainforest of southern Bahia, Brazil. *Zootaxa*, 344, 59– 68.
- Lourenço-de-Moraes, R., Campos, F.S. & Toledo, L.F. (2012b). The tadpole of *Dendropsophus haddadi* (Bastos & Pombal 1996)(Hylidae: Hylinae). *Zootaxa*, 3476, 86– 88.
- Lourenço-de-Moraes, R., Lantyer-Silva, A.S.F., Toledo, L. F. & Solé, M. (2013). Tadpole, oophagy, advertisement call, and geographic distribution of *Aparasphenodon arapapa* Pimenta, Napoli and Haddad 2009 (Anura, Hylidae). *Journal of Herpetology*, 47(4), 575–579.
- Lourenço-de-Moraes, R., Ferreira, R.B., Fouquet, A. & Bastos, R.P. (2014). A new diminutive frog species of *Adelophryne* (Amphibia: Anura: Eleutherodactylidae) from the Atlantic Forest, southeastern Brazil. *Zootaxa*, 3846, 348– 360.
- Lourenço-de-Moraes, R., Ferreira, R.B., Mira-Mendes, C.C.V., Zocca, C.Z., Medeiros, T., Ruas, D.S., Rebouças, R., Toledo, L.F., Brodie Jr., E.D. & Solé, M. (2016). Escalated antipredator mechanisms of two Neotropical marsupial treefrogs. *Herpetological Journal*, 26, 237– 244.
- Lutz, B. (1949 "1948"). Anfíbios anuros da coleção Adolpho Lutz. II. Especies verdes do genero *Hyla* do Leste-Meridional do Brasil. *Memórias do Instituto Oswaldo Cruz. Rio de Janeiro*, 46, 551–577.
- Lutz, B. (1958). Anfíbios novos e raros das Serras Costeiras do Brasil (New or rare frogs from the Coastal Ranges of Brazil). *Memórias do Instituto Oswaldo Cruz. Rio de Janeiro*, 56, 372–389.
- Lutz, B. (1974). *Eleutherodactylus gualteri*, a new species from the Organ Mountains of Brazil. *Journal of Herpetology*, 8, 293–295.

- Lutz, A. (1925). Batraciens du Brésil. Comptes Rendus et Mémoires Hebdomadaires des Séances de la Société de Biologie et des ses Filiales. *Paris* 93, 1925(2), 211–214.
- Lutz, A. & B. Lutz. (1939). New Hylidae from Brazil/Hylideos novos do Brasil. *Anais da Academia Brasileira de Ciências. Rio de Janeiro*, 11, 67–89.
- Measey, J., Wilkinson, M., Silvano, D. & Garcia, P. (2004). *Chthonerpeton viviparum*. The IUCN Red List of Threatened Species 2004: e.T59541A11960849. <http://dx.doi.org/10.2305/IUCN.UK.2004.RLTS.T59541A11960849.en>. Downloaded on 18 July 2016.
- Miranda-Ribeiro, A. (1923). *Basanitia lactea* (Um novo batracchio das collecções do Museu Paulista). *Revista do Museu Paulista. São Paulo*, 13, 851–852.
- Miranda-Ribeiro, A. (1926). Notas para servirem ao estudo dos Gymnobatrachios (Anura) Brasileiros. *Arquivos do Museu Nacional. Rio de Janeiro*, 27, 1–227.
- Nascimento, L. B., Pombal, Jr. J. P. & Haddad, C. F. B. (2001). A new frog of the genus *Hylodes* (Amphibia: Leptodactylidae) from Minas Gerais, Brazil. *Journal of Zoology. London*, 254, 421–428.
- Nascimento, L.B., Cruz, C.A.G. & Feio, R.N. (2005). A new species of diurnal frog in the genus *Crossodactylus* Duméril and Bibron, 1841 (Anura, Leptodactylidae) from southeastern Brazil. *Amphibia-Reptilia*, 26, 497–505.
- Nascimento, L. B. & Pimenta, B. (2010). *Hylodes uai*. The IUCN Red List of Threatened Species 2010: e.T57102A11578594. <http://dx.doi.org/10.2305/IUCN.UK.2010-2.RLTS.T57102A11578594.en>. Downloaded on 19 July 2016.
- Peixoto, O.L., Carvalho-e-Silva, S.P. (2004). *Crossodactylodes pintoii*. The IUCN Red List of Threatened Species 2004: e.T56346A11465671. <http://dx.doi.org/10.2305/IUCN.UK.2004.RLTS.T56346A11465671.en>. Downloaded on 18 July 2016.
- Pimenta, B. & Nascimento, L.B. (2010). *Crossodactylus trachystomus*. The IUCN Red List of Threatened Species 2010: e.T56356A11451810. <http://dx.doi.org/10.2305/IUCN.UK.2010-2.RLTS.T56356A11451810.en>. Downloaded on 19 July 2016.

- Pimenta, B.V S., Cruz, C.A G. & Caramaschi, U. (2014). Taxonomic review of the species complex of *Crossodactylus dispar* A. Lutz, 1925 (Anura, Hylodidae). *Arquivos de Zoologia. São Paulo*, 45, 1–33.
- Peixoto, O. L. (1989 "1988"). Duas novas espécies de *Ololygon* do grupo *perpusilla* (Amphibia, Anura, Hylidae). *Arquivos de Universidade Federal Rural do Rio de Janeiro*, 11, 27–37.
- Peixoto, O. L. & Cruz, C. A. G. (1988). Descrição de duas espécies novas do gênero *Phyllodytes* Wagler (Amphibia, Anura, Hylidae). *Revista Brasileira de Biologia*, 48, 265–272.
- Peixoto, O. L. & Silvano, D. (2004a). *Proceratophrys moehringi*. The IUCN Red List of Threatened Species 2004: e.T57305A11615692.<http://dx.doi.org/10.2305/IUCN.UK.2004.RLTS.T57305A11615692.en>. Downloaded on 19 July 2016.
- Peixoto, O. L. & Silvano, D. (2004b). *Proceratophrys phyllostoma*. The IUCN Red List of Threatened Species 2004: e.T57307A11616136.<http://dx.doi.org/10.2305/IUCN.UK.2004.RLTS.T57307A11616136.en>. Downloaded on 19 July 2016.
- Pombal, J. P., Jr. & Gordo, M. (1991). Duas novas espécies de *Hyla* da floresta atlântica no estado de São Paulo (Amphibia, Anura). *Memórias do Instituto de Butantan. São Paulo*, 53,135–144.
- Pombal, J. P. Jr. & Madureira, C. A. (1997). A new species of *Physalaemus* (Anura, Leptodactylidae) from the Atlantic rain forest of northeastern Brazil. *Alytes. Paris*, 15,105–112.
- Pombal, J. P. Jr. & Haddad, C. F. B. (1999). Frogs of the genus *Paratelmatobius* (Anura: Leptodactylidae) with descriptions of two new species. *Copeia*, 1999, 1014–1026.
- Pombal, J. P., Jr. & Cruz, C. A. G. (1999). Redescritção de *Eleutherodactylus bolbodactylus* (A. Lutz, 1925) e a posição taxonômica de *E. gehrti* (Miranda-Ribeiro, 1926) (Anura, Leptodactylidae). *Boletim do Museu Nacional. Nova Serie, Zoologia. Rio de Janeiro*, 404, 1–10.
- Pombal, J. P. Jr., Prado, G. M. & Canedo, C. (2003). A new species of giant torrent frog, genus *Megaelosia*, from the Atlantic Rain Forest of Espirito Santo, Brazil (Amphibia: Leptodactylidae). *Journal of Herpetology*, 37, 453–460.



- Pombal J. P. Jr. (2004). *Megaelusia apuana*. The IUCN Red List of Threatened Species 2004:  
e.T57179A11580978. <http://dx.doi.org/10.2305/IUCN.UK.2004.RLTS.T57179A11580978.en>. Downloaded on 19 July 2016.
- Ribeiro, L.F., Bornschein, M.R., Belmonte-Lopes, R., Firkowski, C.R., Morato, S.A.A. & Pie M.R. (2015). Seven new microendemic species of *Brachycephalus* (Anura: Brachycephalidae) from southern Brazil. *PeerJ*, 3(e1011), 1–35.
- Rocha, C. F., Sluys, M.V. & Cruz, C. A. G. (2004a). *Hylodes glaber*. The IUCN Red List of Threatened Species 2004:  
e.T57090A11568889. <http://dx.doi.org/10.2305/IUCN.UK.2004.RLTS.T57090A11568889.en>. Downloaded on 19 July 2016.
- Rocha, C. F., Sluys, M. V. & Cruz, C. A. G. (2004b). *Hylodes mertensi*. The IUCN Red List of Threatened Species 2004:  
e.T57095A11570630. <http://dx.doi.org/10.2305/IUCN.UK.2004.RLTS.T57095A11570630.en>. Downloaded on 19 July 2016.
- Rodrigues, M. T. & Cruz, C. A. G. (2004a). *Scinax jureia*. The IUCN Red List of Threatened Species 2004:  
e.T55967A11402443. <http://dx.doi.org/10.2305/IUCN.UK.2004.RLTS.T55967A11402443.en>. Downloaded on 19 July 2016.
- Rodrigues, M. T. & Carvalho-e-Silva, S. P. (2004b). *Cycloramphus ohausi*. The IUCN Red List of Threatened Species 2004:  
e.T56377A11455906. <http://dx.doi.org/10.2305/IUCN.UK.2004.RLTS.T56377A11455906.en>. Downloaded on 19 July 2016.
- Segalla, M.V. & Silvano D. (2004). *Bokermannohyla langei*. The IUCN Red List of Threatened Species 2004:  
e.T10356A3198237. <http://dx.doi.org/10.2305/IUCN.UK.2004.RLTS.T10356A3198237.en>. Downloaded on 18 July 2016.
- Silva, H. R., Britto-Pereira, M. C. & Caramaschi, U. (2003). A new species of *Chthonerpeton* (Amphibia: Gymnophiona: Typhlonectidae) from Bahia, Brazil. *Zootaxa*, 381, 1–11.
- Silvano, D., Garcia, P. & Segalla, M. V. (2004). *Dendrophryniscus stawiarskyi*. The IUCN Red List of Threatened Species 2004:  
e.T54810A11206026. <http://dx.doi.org/10.2305/IUCN.UK.2004.RLTS.T54810A11206026.en>. Downloaded on 19 July 2016.
- Silvano, D. & Peixoto, O. L. (2004a). *Dendropsophus dutrai*. The IUCN Red List of Threatened Species 2004:  
e.T55469A11315767. <http://dx.doi.org/10.2305/IUCN.UK.2004.RLTS.T55469A11315767.en>. Downloaded on 19 July 2016.

- Silvano, D. & Peixoto, O. L. (2004b). *Ischnocnema epipeda*. The IUCN Red List of Threatened Species 2004: e.T56581A11486386.<http://dx.doi.org/10.2305/IUCN.UK.2004.RLTS.T56581A11486386.en>. Downloaded on 19 July 2016.
- Silvano, D., Heyer, R. Carvvalho-e-Silva, S. P. & Wilkinson, M. (2004a). *Mimosiphonops vermiculatus*. The IUCN Red List of Threatened Species 2004: e.T59576A11951989. <http://dx.doi.org/10.2305/IUCN.UK.2004.RLTS.T59576A11951989.en>. Downloaded on 19 July 2016.
- Silvano, D., Garcia, P. & Wilkinson, M. (2004b). *Oscacilia hypereumeces*. The IUCN Red List of Threatened Species 2004: e.T59581A11953507.<http://dx.doi.org/10.2305/IUCN.UK.2004.RLTS.T59581A11953507.en>. Downloaded on 19 July 2016.
- Silvano, D. & Peixoto, O. L. (2004c). *Sphaenorhynchus bromelicola*. The IUCN Red List of Threatened Species 2004: e.T56012A11408022.<http://dx.doi.org/10.2305/IUCN.UK.2004.RLTS.T56012A11408022.en>. Downloaded on 19 July 2016.
- Silvano, D. & Pimenta, B. (2004a). *Xenohyla eugenioi*. The IUCN Red List of Threatened Species 2004: e.T29431A9496631.<http://dx.doi.org/10.2305/IUCN.UK.2004.RLTS.T29431A9496631.en>. Downloaded on 19 July 2016.
- Silvano, D. & Pimenta, B. (2004b). *Crossodactylus lutzorum*. The IUCN Red List of Threatened Species 2004: e.T56354A11467106.<http://dx.doi.org/10.2305/IUCN.UK.2004.RLTS.T56354A11467106.en>. Downloaded on 19 July 2016.
- Skuk, G. & Freire, E. M. X. (2004). *Phyllodytes brevirostris*. The IUCN Red List of Threatened Species 2004: e.T55831A11376414.<http://dx.doi.org/10.2305/IUCN.UK.2004.RLTS.T55831A11376414.en>. Downloaded on 19 July 2016.
- Sluys, M. V. & Cruz, C. A. G. (2004). *Ischnocnema gehrti*. The IUCN Red List of Threatened Species 2004: e.T56612A11504303.<http://dx.doi.org/10.2305/IUCN.UK.2004.RLTS.T56612A11504303.en>. Downloaded on 19 July 2016.
- Taylor, E. H. (1968). *The Caecilians of the World: A Taxonomic Review*. Lawrence: University of Kansas Press.
- Toledo, L. F., Ribeiro, R. S., & Haddad, C. F. B. (2007). Anurans as prey: an exploratory analysis and size relationships between predators and their prey. *Journal of Zoology*, 271: 170–177.

- Verdade, V. & Segalla, M. V. (2004). *Cycloramphus duseni*. The IUCN Red List of Threatened Species 2004: e.T56367A11467919.<http://dx.doi.org/10.2305/IUCN.UK.2004.RLTS.T56367A11467919.en>. Downloaded on 19 July 2016.
- Verdade, V. & Carvalho-e-Silva, S. P. (2004). *Cycloramphus fuliginosus*. The IUCN Red List of Threatened Species 2004: e.T56369A11468170.<http://dx.doi.org/10.2305/IUCN.UK.2004.RLTS.T56369A11468170.en>. Downloaded on 19 July 2016.
- Verdade, V. & Heyer, R. (2004a). *Cycloramphus semipalmatus*. The IUCN Red List of Threatened Species 2004: e.T56379A11456623.<http://dx.doi.org/10.2305/IUCN.UK.2004.RLTS.T56379A11456623.en>. Downloaded on 19 July 2016.
- Verdade, V. & Heyer, R. (2004b). *Cycloramphus stejnegeri*. The IUCN Red List of Threatened Species 2004: e.T56380A11457392.<http://dx.doi.org/10.2305/IUCN.UK.2004.RLTS.T56380A11457392.en>. Downloaded on 19 July 2016.
- Weber, L. N., Gonzaga, L. P. & Carvalho-e-Silva, S. P. (2006 "2005"). A new species of *Physalaemus* Fitzinger, 1826 from the lowland Atlantic Forest of Rio de Janeiro state, Brazil (Amphibia, Anura, Leptodactylidae). *Arquivos do Museu Nacional. Rio de Janeiro*, 63, 677–684.
- Wells, K.D. (2007). *The ecology and behavior of amphibians*. University of Chicago Press.
- Weygoldt, P. & Peixoto, O. L. (1985). A new species of horned toad (*Proceratophrys*) from Espirito Santo, Brazil (Amphibia: Salientia: Leptodactylidae). *Senckenbergiana Biologica*, 66, 1–8.
- Wilkinson, M. (2004). *Chthonerpeton noctinectes*. The IUCN Red List of Threatened Species 2004: e.T59538A11960466.<http://dx.doi.org/10.2305/IUCN.UK.2004.RLTS.T59538A11960466.en>. Downloaded on 18 July 2016.
