# Supplementary material
Source: PubMed Central journal article supplement (PMC7166796)
Supplement: JBI-47-275-s002.pdf [file JBI-47-275-s002.pdf]

## APPENDIX 2

### Functional traits explain amphibian distribution in the Brazilian Atlantic Forest

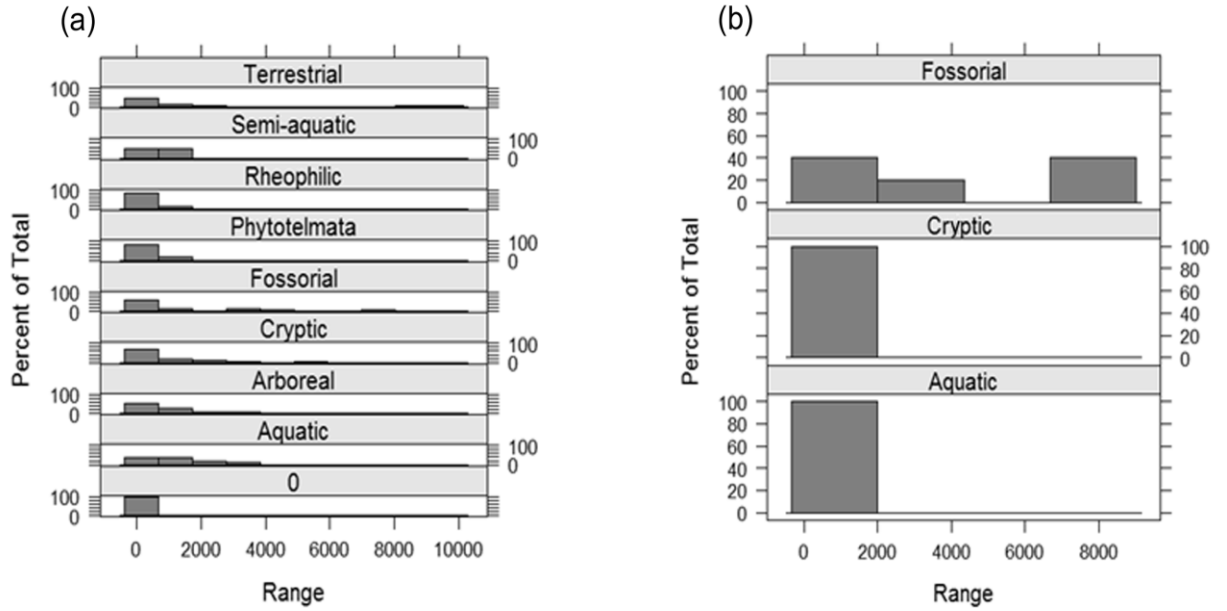

**FIGURE 2.1** Histogram showing the percentage of species functional traits vs. distribution (range). (a) Anurans percentage habit, subtraits vs. range; (b) Gymnophionas percentage habit, subtraits vs. range.

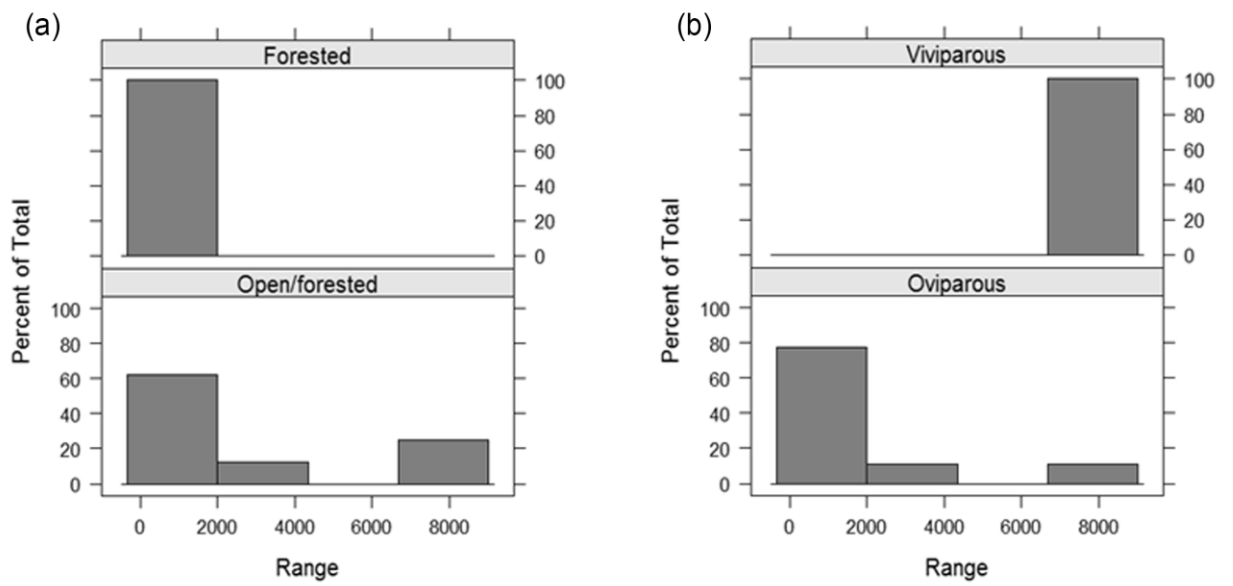

**FIGURE 2.2** Histogram showing the percentage of species functional traits vs. distribution (range). (a) Gymnophionas percentage reproductive mode, subtraits vs. range; (b) Gymnophionas habitat, subtraits vs. range.

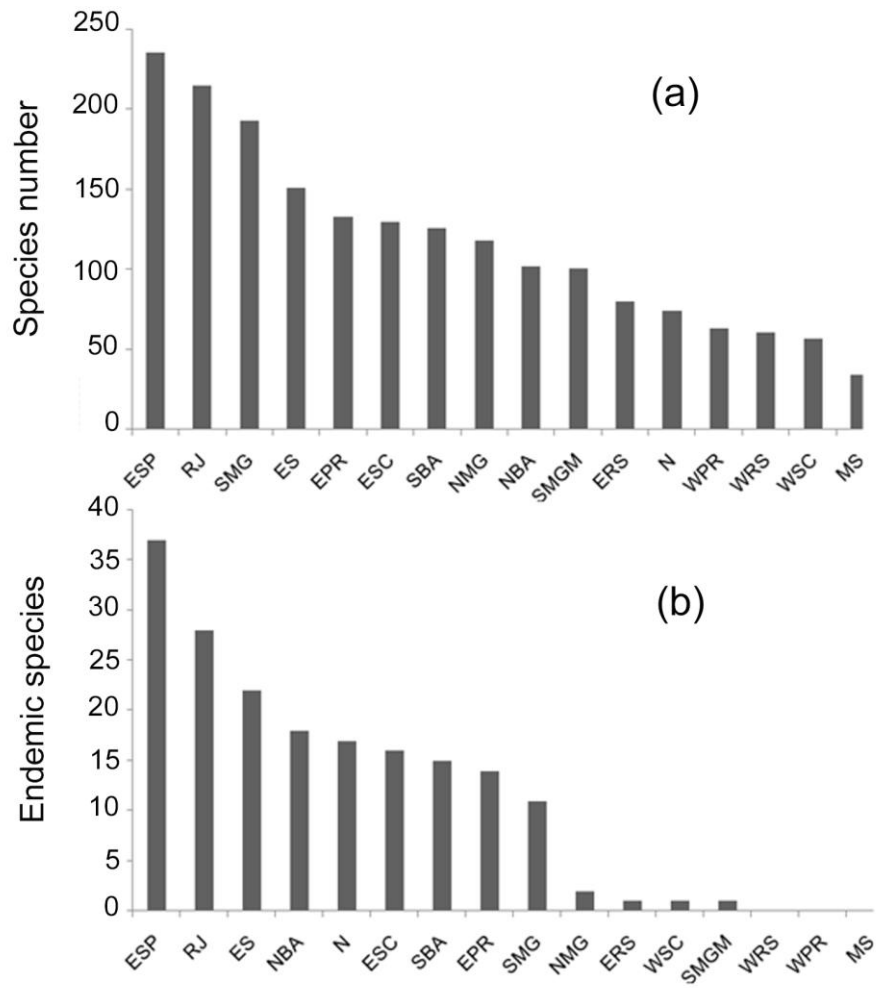

**FIGURE 2.3** Total number of amphibian species (a), and amphibian endemic species (b), by study sites in the Brazilian Atlantic Forest.

**TABLE 2.1** Association of amphibian species richness to environmental variables in the Brazilian Atlantic Forest by the PERMANOVA. The *P* value in bold indicate significant values ( $P < 0.01$ ).

| Variables                    | df    | <i>F</i> model | $R^2$   | <i>P</i> value |
|------------------------------|-------|----------------|---------|----------------|
| Altitude                     | 1     | 4.4            | 0.00017 | 0.036          |
| AET - Evapotranspiration     | 1     | 38.3           | 0.0015  | <b>0.001</b>   |
| NPP - Net primary production | 1     | 2198           | 0.08597 | <b>0.001</b>   |
| Precipitation                | 1     | 2917.4         | 0.11411 | <b>0.001</b>   |
| Temperature                  | 1     | 10046.3        | 0.39294 | <b>0.001</b>   |
| Tree cover                   | 1     | 10.9           | 0.00043 | <b>0.001</b>   |
| Residuals                    | 10352 | –              | 0.40489 | –              |
| Total                        | 10358 | –              | 1.00    | –              |

**TABLE 2.2** Association of amphibian species endemics to environmental variables in the Brazilian Atlantic Forest by the PERMANOVA. The *P* value in bold indicate significant values ( $P < 0.01$ ).

| Variables                    | df    | <i>F</i> model | $R^2$   | <i>P</i> value |
|------------------------------|-------|----------------|---------|----------------|
| Altitude                     | 1     | 413.2          | 0.02948 | <b>0.001</b>   |
| AET - Evapotranspiration     | 1     | 19.3           | 0.00137 | <b>0.001</b>   |
| NPP - Net primary production | 1     | 4.1            | 0.00029 | 0.049          |
| Precipitation                | 1     | 0.3            | 0.00002 | 0.578          |
| Temperature                  | 1     | 3202.0         | 0.22845 | <b>0.001</b>   |
| Tree cover                   | 1     | 25.5           | 0.00182 | <b>0.001</b>   |
| Residuals                    | 10352 | –              | 0.73856 | –              |
| Total                        | 10358 | –              | 1.00    | –              |

**TABLE 2.3** Association of species range to the functional traits to Anuran in the Brazilian Atlantic Forest by the PERMANOVA. The *P* value in bold indicate significant values ( $P < 0.05$ ).

| Variables         | df  | <i>F</i> model | $R^2$   | <i>P</i> value |
|-------------------|-----|----------------|---------|----------------|
| Activity          | 1   | 0.086          | 0.00014 | 0.772          |
| Body size         | 1   | 22.14          | 0.03613 | <b>0.001</b>   |
| Toxicity          | 1   | 5.011          | 0.00818 | <b>0.021</b>   |
| Habit             | 1   | 12.056         | 0.01967 | <b>0.002</b>   |
| Habitat           | 1   | 57.575         | 0.09394 | <b>0.001</b>   |
| Reproductive mode | 1   | 1.013          | 0.00165 | 0.312          |
| Residuals         | 515 | –              | 0.84029 | –              |
| Total             | 521 | –              | 1.00000 | –              |

**TABLE 2.4** Association of species range to the functional traits to Gymnophionas in the Brazilian Atlantic Forest by the PERMANOVA. The *P* value in bold indicate significant values ( $P < 0.05$ ).

| Variables         | df | <i>F</i> model | $R^2$   | <i>P</i> value |
|-------------------|----|----------------|---------|----------------|
| Body size         | 1  | 1.346          | 0.02823 | 0.282          |
| Habit             | 1  | 2.674          | 0.05609 | 0.175          |
| Habitat           | 1  | 32.126         | 0.67401 | <b>0.001</b>   |
| Reproductive mode | 1  | 7.519          | 0.15775 | <b>0.027</b>   |
| Residuals         | 4  | –              | 0.08392 | –              |
| Total             | 8  | –              | 1.00000 | –              |

**TABLE 2.5** Association of species range to the functional sub-traits to anurans in the Brazilian Atlantic Forest by the ANOVA. The *P* value in bold indicate significant values ( $P < 0.05$ ).

| Variables               | df  | F value | <i>P</i> value |
|-------------------------|-----|---------|----------------|
| Habit                   |     |         |                |
| Arboreal                | 1   | 2.69    | 0.10           |
| Phytotelmata            | 1   | 0.21    | 0.64           |
| Terrestrial             | 1   | 8.97    | <b>0.00</b>    |
| Cryptic                 | 1   | 0.56    | 0.45           |
| Fossorial               | 1   | 2.76    | 0.09           |
| Rheophilic              | 1   | 0.09    | 0.76           |
| Semi-aquatic            | 1   | 0.26    | 0.61           |
| Aquatic                 | 1   | 1.22    | 0.27           |
| Residuals               | 513 |         |                |
| Body size               |     |         |                |
| Miniature               | 1   | 0.05    | 0.80           |
| Small                   | 1   | 3.75    | 0.06           |
| Medium                  | 1   | 12.44   | <b>0.00</b>    |
| Large                   | 1   | 3.15    | 0.09           |
| Residuals               | 513 |         |                |
| Habitat                 |     |         |                |
| Forested                | 1   | 0.65    | 0.41           |
| Open area               | 1   | 12.66   | <b>0.00</b>    |
| Open forested           | 1   | 7.30    | <b>0.00</b>    |
| Residuals               | 518 |         |                |
| Poisonous               |     |         |                |
| Toxic                   | 1   | 15.68   | <b>0.00</b>    |
| Unpalatable or bad odor | 1   | 1.09    | 0.26           |
| Non-toxic               | 1   | 9.51    | <b>0.00</b>    |
| Residuals               | 518 |         |                |



**TABLE 2.6** Association of species range to the functional sub-traits to Gymnophionas in the Brazilian Atlantic Forest by the Kruskal-Wallis ( $P < 0.05$ ).

| Variables         | Chi-squared | df | <i>P</i> value |
|-------------------|-------------|----|----------------|
| Habit             | 55.236      | 2  | 0.063          |
| Habitat           | 33.409      | 1  | 0.067          |
| Reproductive Mode | 14.848      | 1  | 0.223          |

**TABLE 2.7** Partitioning of amphibian beta diversity. Analyses were made from the territory with greater species richness for the other subsets. A mean of the results of each territories of each group and presented for evaluation difference between the species similarity groups. In bold shown the greatest diversity beta values.

| Groups         | Sørensen ( $\beta_{sor}$ ) |              |              |              | Nestodness ( $\beta_{nes}$ ) |              |              |              | Turnover ( $\beta_{sim}$ ) |              |          |           |
|----------------|----------------------------|--------------|--------------|--------------|------------------------------|--------------|--------------|--------------|----------------------------|--------------|----------|-----------|
|                | All altitudes              | 0-300m       | 300-700m     | 700-2000m    | All altitudes                | 0-300m       | 300-700m     | 700-2000m    | All altitudes              | 0-300m       | 300-700m | 700-2000m |
| <b>Group1</b>  |                            |              |              |              |                              |              |              |              |                            |              |          |           |
| ESP            | 0.000                      | 0.000        | 0.000        | 0.000        | 0.000                        | 0.000        | 0.000        | 0.000        | 0.000                      | 0.000        | 0.000    | 0.000     |
| RJ             | 0.282                      | 0.263        | 0.263        | 0.269        | 0.035                        | 0.016        | 0.029        | 0.039        | 0.247                      | 0.247        | 0.234    | 0.229     |
| SMG            | 0.329                      | <b>0.403</b> | 0.268        | 0.314        | 0.075                        | 0.195        | 0.069        | 0.060        | 0.254                      | <b>0.416</b> | 0.199    | 0.254     |
| Mean           | 0.203                      | 0.222        | 0.177        | 0.194        | 0.037                        | 0.070        | 0.033        | 0.033        | 0.167                      | 0.332        | 0.217    | 0.242     |
| DP $\pm$       | 0.178                      | 0.205        | 0.153        | 0.170        | 0.037                        | 0.108        | 0.035        | 0.031        | 0.144                      | 0.119        | 0.025    | 0.017     |
| <b>Group2a</b> |                            |              |              |              |                              |              |              |              |                            |              |          |           |
| SMGM           | 0.460                      | 0.751        | 0.446        | 0.448        | 0.361                        | 0.551        | 0.381        | 0.357        | 0.099                      | 0.200        | 0.065    | 0.091     |
| WPR            | 0.666                      | 0.719        | 0.736        | 0.654        | 0.459                        | 0.452        | 0.444        | 0.460        | 0.206                      | 0.267        | 0.210    | 0.194     |
| WSC            | 0.734                      | 0.713        | 0.727        | 0.741        | 0.418                        | 0.436        | 0.393        | 0.447        | 0.316                      | 0.277        | 0.333    | 0.294     |
| MS             | 0.770                      | 0.750        | 0.757        | 0.000        | 0.682                        | 0.574        | 0.669        | 0.000        | 0.088                      | 0.176        | 0.088    | 0.000     |
| WRS            | 0.744                      | 0.710        | 0.749        | 0.785        | 0.367                        | 0.330        | 0.353        | 0.460        | 0.377                      | 0.379        | 0.397    | 0.326     |
| Mean           | <b>0.675</b>               | <b>0.729</b> | <b>0.683</b> | <b>0.657</b> | <b>0.457</b>                 | <b>0.469</b> | <b>0.448</b> | <b>0.431</b> | 0.217                      | 0.260        | 0.218    | 0.226     |
| DP $\pm$       | 0.126                      | 0.020        | 0.133        | 0.150        | 0.132                        | 0.098        | 0.128        | 0.050        | 0.128                      | 0.079        | 0.146    | 0.106     |
| <b>Group2b</b> |                            |              |              |              |                              |              |              |              |                            |              |          |           |
| EPR            | 0.491                      | 0.248        | 0.457        | 0.499        | 0.197                        | 0.248        | 0.237        | 0.194        | 0.293                      | 0.154        | 0.220    | 0.305     |
| ESC            | 0.612                      | 0.148        | 0.592        | 0.595        | 0.158                        | 0.148        | 0.181        | 0.168        | 0.454                      | 0.429        | 0.410    | 0.427     |
| ERS            | 0.747                      | 0.250        | 0.736        | 0.733        | 0.247                        | 0.250        | 0.256        | 0.281        | 0.500                      | 0.478        | 0.480    | 0.452     |
| Mean           | <b>0.616</b>               | 0.215        | <b>0.595</b> | <b>0.609</b> | 0.201                        | 0.215        | 0.225        | 0.214        | <b>0.416</b>               | 0.353        | 0.370    | 0.395     |
| DP $\pm$       | 0.128                      | 0.058        | 0.140        | 0.118        | 0.044                        | 0.058        | 0.039        | 0.059        | 0.109                      | 0.175        | 0.134    | 0.079     |

**Group3**

|      |              |              |              |              |       |       |       |       |              |              |              |              |
|------|--------------|--------------|--------------|--------------|-------|-------|-------|-------|--------------|--------------|--------------|--------------|
| ES   | 0.576        | 0.511        | 0.546        | 0.567        | 0.119 | 0.095 | 0.142 | 0.153 | 0.457        | 0.416        | 0.404        | 0.414        |
| SBA  | 0.702        | 0.673        | 0.693        | 0.679        | 0.130 | 0.091 | 0.152 | 0.268 | 0.571        | 0.582        | 0.541        | 0.412        |
| NBA  | 0.757        | 0.718        | 0.743        | 0.765        | 0.159 | 0.144 | 0.187 | 0.258 | 0.598        | 0.574        | 0.556        | 0.507        |
| NMG  | 0.599        | 0.576        | 0.589        | 0.589        | 0.201 | 0.199 | 0.207 | 0.243 | 0.398        | 0.378        | 0.382        | 0.346        |
| N    | 0.787        | 0.757        | 0.791        | 0.798        | 0.233 | 0.195 | 0.245 | 0.281 | 0.554        | 0.562        | 0.545        | 0.517        |
| Mean | <b>0.684</b> | <b>0.647</b> | <b>0.672</b> | <b>0.680</b> | 0.168 | 0.145 | 0.187 | 0.241 | <b>0.516</b> | <b>0.502</b> | <b>0.486</b> | <b>0.439</b> |
| DP ± | 0.094        | 0.102        | 0.103        | 0.103        | 0.048 | 0.052 | 0.042 | 0.051 | 0.085        | 0.098        | 0.085        | 0.072        |

---

---
